# Supplementary material for: DNA methylation epigenetically silences crossover hot spots and controls chromosomal domains of meiotic recombination in Arabidopsis
Source: PubMed Central journal article supplement — Genes Dev. 2015 Oct 15;29(20):2183–202. doi: 10.1101/gad.270876.115 (PMC4617981; doi:10.1101/gad.270876.115), 2015-10-15

## **DNA methylation epigenetically silences crossover hotspots and controls chromosomal domains of meiotic recombination in Arabidopsis**

Nataliya E. Yelina, Christophe Lambing, Thomas J. Hardcastle, Xiaohui Zhao, Bruno Santos and Ian R. Henderson

### **SUPPLEMENTAL FIGURE LEGENDS**

#### **Supplemental Figure S1. Crossovers numbers in wild type and *met1* backcross populations.**

Histograms showing the numbers of crossovers identified by low coverage sequencing in wild type (Col/Ler) or *met1* (Col/Ler) male backcross populations. Mean values are indicated by the vertical dotted red lines. Histograms for individual chromosomes are also shown. Artefactual *met1* crossovers are identified on chromosome 5, due to the presence of a Col/Col region on the south arm of chromosome 5, remaining from introgression of *met1-3* (Col) into Ler.

#### **Supplemental Figure S2. Meiotic DNA double strand break foci in proximity to chromocenters in wild type and *met1*. (A-H)**

Localization of  $\gamma$ -H2A.X (red) in wild-type Col (A-D) and *met1-3* (E-H) leptotene stage nuclei. Images show blow-ups of densely DAPI-stained centromeric regions marked with white arrowheads. Yellow arrowheads indicate  $\gamma$ -H2A.X foci localized within the DAPI-dense regions. Images (A) and (B) are blow-ups of the nuclei shown in Fig. 6A-6C. Images (E) and (F) are blow-ups of the nuclei shown in Fig. 6D-6F. Scale bars =1  $\mu$ M.

## SUPPLEMENTAL TABLES

**Supplemental Table 1.** Crossover distributions within the 3a hotspot in wild type and methylated *HP3* hairpin lines. Shading indicates positions overlapping hairpin targeted regions.

**Supplemental Table 2.** Crossover distributions within the 3a hotspot in wild type and methylated hairpin *HP4* lines.

**Supplemental Table 3.** Crossover distributions within the 3b hotspot in wild type and methylated hairpin lines. Shading indicates positions overlapping hairpin targeted regions.

**Supplemental Table 4.** Coordinates of 3a and 3b hotspot RdDM target regions and those analysed by sodium bisulphite sequencing, chromatin immunoprecipitation (ChIP) or *McrBC*.

**Supplemental Table 5.** DNA methylation in wild type and *HP* lines assayed by sodium-bisulphite sequencing.

**Supplemental Table 6.** Sodium bisulphite sequencing analysis of DNA methylation in the 5' proximal interval of *HP3*.

**Supplemental Table 7.** Sodium bisulphite sequencing analysis of DNA methylation in the central interval of *HP3*.

**Supplemental Table 8.** Sodium bisulphite sequencing analysis of DNA methylation in the 3' proximal interval of *HP3*.

**Supplemental Table 9.** Sodium bisulphite sequencing analysis of DNA methylation in the 5' proximal interval of *HP4*.

**Supplemental Table 10.** Sodium bisulphite sequencing analysis of DNA methylation in the central interval of *HP4*.

**Supplemental Table 11.** Sodium bisulphite sequencing analysis of DNA methylation in the 3' proximal interval of *HP4*.

**Supplemental Table 12.** Sodium bisulphite sequencing analysis of DNA methylation in the 5' proximal interval of *HP5*.

**Supplemental Table 13.** Sodium bisulphite sequencing analysis of DNA methylation in the central interval of *HP5*.

**Supplemental Table 14.** Sodium bisulphite sequencing analysis of DNA methylation in the 3' proximal interval of *HP5*.

**Supplemental Table 15.** Aligning read pairs for barcoded libraries generated from wild type or *met1* Col/Ler backcross individuals.

**Supplemental Table 16.** Crossover and double crossover numbers identified by low coverage sequencing of wild type (n=187) and *met1* (n=192) Col/Ler backcross populations.

**Supplemental Table 17.** *11b* genetic distance in wild type, meiotic recombination and DNA methylation mutants.

**Supplemental Table 18.** *CEN3* genetic distance in wild type, meiotic recombination and DNA methylation mutants.

**Supplemental Table 19.** Tetrad analysis of genetic distance and crossover interference in wild type and *met1*.

**Supplemental Table 20.** Genetic distances of *CEN3* and *420* in wild type naïve and *met1* backgrounds.

**Supplemental Table 21.** *CEN3* recombination data in wild type and *met1* backgrounds.

**Supplemental Table 22.** *420* recombination data in wild type and *met1* backgrounds.

**Supplemental Table 23.** Coverage of cytosines in CG, CHG and CHH contexts for each individual bisulfite sequenced.

**Supplemental Table 24.** Analysis of sodium bisulphite conversion based on chloroplast genomic DNA.

**Supplemental Table 25.** Methylation levels in *420-CEN3* naïve Col-0 and *met1/+* individuals.

**Supplemental Table 26.** Correlations between crossover frequency and DNA methylation levels between chromosomal regions.

**Supplemental Table 27.**  $\gamma$ -H2AX foci count in wild type and *met1* leptotene stage meiocytes.

**Supplemental Table 28.** Fertility of *met1 spo11* mutant backgrounds.

**Supplemental Table 29.** Oligonucleotides.

**Supplemental Table 1.** Crossover distributions within the 3a hotspot in wild type and methylated *HP3* hairpin lines. Shading indicates positions overlapping hairpin targeted regions.

| Coordinates (bp) | Interval length (bp) | Crossovers (Col/Ler) | cM/Mb (Col/Ler) | Crossovers ( <i>HP3</i> /Ler) | cM/Mb ( <i>HP3</i> /Ler) |
|------------------|----------------------|----------------------|-----------------|-------------------------------|--------------------------|
| 634,109          | 829                  | 14                   | 15.53           | 22                            | 17.44                    |
| 634,938          | 1,181                | 5                    | 3.89            | 9                             | 5.01                     |
| 636,119          | 80                   | 3                    | 34.49           | 0                             | 0                        |
| 636,199          | 1,084                | 22                   | 18.67           | 8                             | 4.85                     |
| 637,283          | 94                   | 5                    | 48.93           | 0                             | 0                        |
| 637,377          | 377                  | 14                   | 34.16           | 0                             | 0                        |
| 637,754          | 220                  | 15                   | 62.71           | 1                             | 2.99                     |
| 637,974          | 509                  | 35                   | 63.25           | 1                             | 1.29                     |
| 638,483          | 31                   | 0                    | 0               | 0                             | 0                        |
| 638,514          | 11                   | 0                    | 0               | 0                             | 0                        |
| 638,525          | 78                   | 0                    | 0               | 0                             | 0                        |
| 638,603          | 30                   | 0                    | 0               | 0                             | 0                        |
| 638,633          | 6                    | 0                    | 0               | 0                             | 0                        |
| 638,639          | 32                   | 0                    | 0               | 0                             | 0                        |
| 638,671          | 6                    | 0                    | 0               | 0                             | 0                        |
| 638,677          | 2                    | 0                    | 0               | 0                             | 0                        |
| 638,679          | 2                    | 0                    | 0               | 0                             | 0                        |
| 638,681          | 6                    | 0                    | 0               | 0                             | 0                        |
| 638,687          | 92                   | 3                    | 29.99           | 1                             | 7.14                     |
| 638,779          | 885                  | 80                   | 83.15           | 54                            | 40.10                    |
| 639,664          | 210                  | 12                   | 52.56           | 7                             | 21.90                    |
| 639,874          | 60                   | 4                    | 61.32           | 2                             | 21.90                    |
| 639,934          | 0                    | 0                    | 0               | 0                             | 0                        |
| Total            | 5,825                | 212                  | 34.68           | 105                           | 11.85                    |

**Supplemental Table 2.** Crossover distributions within the 3a hotspot in wild type and methylated hairpin *HP4* lines. Shading indicates positions overlapping hairpin targeted regions.

| Coordinates (bp) | Interval length (bp) | Crossovers (Col/Ler) | cM/Mb (Col/Ler) | Crossovers ( <i>HP4</i> /Ler) | cM/Mb ( <i>HP4</i> /Ler) |
|------------------|----------------------|----------------------|-----------------|-------------------------------|--------------------------|
| 634,109          | 829                  | 14                   | 15.53           | 18                            | 19.16                    |
| 634,938          | 1,181                | 5                    | 3.89            | 5                             | 3.74                     |
| 636,119          | 80                   | 3                    | 34.49           | 1                             | 11.03                    |
| 636,199          | 1,084                | 22                   | 18.67           | 25                            | 20.35                    |
| 637,283          | 94                   | 5                    | 48.93           | 4                             | 37.55                    |
| 637,377          | 377                  | 14                   | 34.16           | 10                            | 23.40                    |
| 637,754          | 220                  | 15                   | 62.71           | 9                             | 36.10                    |
| 637,974          | 509                  | 35                   | 63.25           | 8                             | 13.87                    |
| 638,483          | 31                   | 0                    | 0               | 0                             | 0                        |
| 638,514          | 11                   | 0                    | 0               | 0                             | 0                        |
| 638,525          | 78                   | 0                    | 0               | 0                             | 0                        |
| 638,603          | 30                   | 0                    | 0               | 0                             | 0                        |
| 638,633          | 6                    | 0                    | 0               | 0                             | 0                        |
| 638,639          | 32                   | 0                    | 0               | 0                             | 0                        |
| 638,671          | 6                    | 0                    | 0               | 0                             | 0                        |
| 638,677          | 2                    | 0                    | 0               | 0                             | 0                        |
| 638,679          | 2                    | 0                    | 0               | 0                             | 0                        |
| 638,681          | 6                    | 0                    | 0               | 0                             | 0                        |
| 638,687          | 92                   | 3                    | 29.99           | 1                             | 9.59                     |
| 638,779          | 885                  | 80                   | 83.15           | 15                            | 14.96                    |
| 639,664          | 210                  | 12                   | 52.56           | 5                             | 21.01                    |
| 639,874          | 60                   | 4                    | 61.32           | 1                             | 14.71                    |
| 639,934          | 0                    | 0                    | 0               | 0                             | 0                        |
| Total            | 5,825                | 212                  | 34.68           | 102                           | 15.62                    |

**Supplemental Table 3.** Crossover distributions within the *3b* hotspot in wild type and methylated hairpin lines. Shading indicates positions overlapping hairpin targeted regions.

| Coordinates (bp) | Interval length (bp) | Crossovers (Col/Ler) | cM/Mb (Col/Ler) | Crossovers ( <i>HP5</i> /Ler) | cM/Mb ( <i>HP5</i> /Ler) |
|------------------|----------------------|----------------------|-----------------|-------------------------------|--------------------------|
| 647,266          | 200                  | 0                    | 0               | 0                             | 0                        |
| 647,466          | 55                   | 3                    | 58.0            | 2                             | 5.4                      |
| 647,521          | 270                  | 12                   | 47.2            | 21                            | 11.6                     |
| 647,791          | 316                  | 1                    | 3.4             | 4                             | 1.9                      |
| 648,107          | 222                  | 11                   | 52.7            | 13                            | 8.7                      |
| 648,329          | 322                  | 11                   | 36.3            | 6                             | 2.8                      |
| 648,651          | 376                  | 17                   | 48.1            | 13                            | 5.2                      |
| 649,027          | 191                  | 11                   | 61.2            | 12                            | 9.4                      |
| 649,218          | 200                  | 13                   | 69.1            | 9                             | 6.7                      |
| 649,418          | 788                  | 21                   | 28.3            | 13                            | 2.5                      |
| 650,206          | 362                  | 7                    | 20.6            | 6                             | 2.5                      |
| 650,568          | 8                    | 0                    | 0               | 0                             | 0                        |
| 650,576          | 50                   | 0                    | 0               | 0                             | 0                        |
| 650,626          | 4                    | 0                    | 0               | 0                             | 0                        |
| 650,630          | 5                    | 0                    | 0               | 0                             | 0                        |
| 650,635          | 123                  | 0                    | 0               | 1                             | 1.2                      |
| 650,758          | 41                   | 0                    | 0               | 0                             | 0                        |
| 650,799          | 90                   | 0                    | 0               | 0                             | 0                        |
| 650,889          | 1                    | 0                    | 0               | 0                             | 0                        |
| 650,890          | 4                    | 0                    | 0               | 0                             | 0                        |
| 650,894          | 14                   | 0                    | 0               | 1                             | 10.7                     |
| 650,908          | 24                   | 0                    | 0               | 0                             | 0                        |
| 650,933          | 138                  | 0                    | 0               | 0                             | 0                        |
| 651,071          | 4                    | 0                    | 0               | 0                             | 0                        |
| 651,075          | 11                   | 0                    | 0               | 0                             | 0                        |
| 651,086          | 2                    | 0                    | 0               | 0                             | 0                        |
| 651,088          | 8                    | 0                    | 0               | 0                             | 0                        |
| 651,096          | 16                   | 0                    | 0               | 0                             | 0                        |
| 651,112          | 10                   | 0                    | 0               | 0                             | 0                        |
| 651,122          | 8                    | 0                    | 0               | 0                             | 0                        |
| 651,130          | 15                   | 0                    | 0               | 0                             | 0                        |
| 651,145          | 7                    | 0                    | 0               | 0                             | 0                        |
| 651,152          | 2                    | 0                    | 0               | 0                             | 0                        |
| 651,154          | 25                   | 0                    | 0               | 0                             | 0                        |
| 651,179          | 11                   | 0                    | 0               | 17                            | 230.7                    |
| 651,190          | 34                   | 0                    | 0               | 0                             | 0                        |
| 651,224          | 24                   | 0                    | 0               | 0                             | 0                        |
| 651,248          | 7                    | 0                    | 0               | 0                             | 0                        |

|         |       |     |       |     |      |
|---------|-------|-----|-------|-----|------|
| 651,255 | 2     | 0   | 0     | 0   | 0    |
| 651,257 | 3     | 0   | 0     | 0   | 0    |
| 651,260 | 14    | 0   | 0     | 0   | 0    |
| 651,274 | 5     | 0   | 0     | 0   | 0    |
| 651,279 | 8     | 0   | 0     | 0   | 0    |
| 651,287 | 17    | 0   | 0     | 0   | 0    |
| 651,304 | 6     | 0   | 0     | 0   | 0    |
| 651,310 | 18    | 0   | 0     | 0   | 0    |
| 651,328 | 5     | 0   | 0     | 0   | 0    |
| 651,333 | 2     | 0   | 0     | 0   | 0    |
| 651,335 | 4     | 0   | 0     | 0   | 0    |
| 651,339 | 18    | 0   | 0     | 0   | 0    |
| 651,357 | 1     | 0   | 0     | 0   | 0    |
| 651,358 | 5     | 0   | 0     | 0   | 0    |
| 651,363 | 4     | 0   | 0     | 0   | 0    |
| 651,367 | 4     | 0   | 0     | 0   | 0    |
| 651,371 | 28    | 0   | 0     | 0   | 0    |
| 651,399 | 25    | 0   | 0     | 0   | 0    |
| 651,424 | 2     | 0   | 0     | 0   | 0    |
| 651,426 | 7     | 0   | 0     | 0   | 0    |
| 651,433 | 2     | 0   | 0     | 0   | 0    |
| 651,435 | 8     | 0   | 0     | 0   | 0    |
| 651,443 | 1     | 0   | 0     | 0   | 0    |
| 651,444 | 9     | 0   | 0     | 0   | 0    |
| 651,453 | 1     | 0   | 0     | 0   | 0    |
| 651,454 | 30    | 0   | 0     | 0   | 0    |
| 651,484 | 24    | 0   | 0     | 0   | 0    |
| 651,508 | 10    | 0   | 0     | 1   | 14.9 |
| 651,518 | 16    | 0   | 0     | 0   | 0    |
| 651,534 | 125   | 0   | 0     | 0   | 0    |
| 651,659 | 54    | 4   | 78.7  | 8   | 22.1 |
| 651,713 | 525   | 0   | 0     | 0   | 0    |
| 652,238 | 191   | 0   | 0     | 7   | 5.5  |
| 652,429 | 583   | 0   | 0     | 0   | 0    |
| 653,012 | 0     | 0   | 0     | 0   | 0    |
| Total   | 5,746 | 111 | 21.41 | 134 | 3.5  |

**Supplemental Table 4.** Coordinates of 3a and 3b hotspot RdDM target regions and those analysed by sodium bisulphite sequencing, chromatin immunoprecipitation (ChIP) or *McrBC*.

| Start (bp) | End (bp) | Size  | Fragment          | Hotspot   | Description           |
|------------|----------|-------|-------------------|-----------|-----------------------|
| 634,082    | 634,934  | 852   | <i>HP1</i>        | <i>3a</i> | Hairpin arm           |
| 635,048    | 636,794  | 1,746 | <i>HP2</i>        | <i>3a</i> | Hairpin arm           |
| 637,091    | 638,234  | 1,143 | <i>HP3</i>        | <i>3a</i> | Hairpin arm           |
| 638,334    | 639,011  | 677   | <i>HP4</i>        | <i>3a</i> | Hairpin arm           |
| 647,649    | 650,049  | 2,400 | <i>HP5</i>        | <i>3b</i> | Hairpin arm           |
| 636,962    | 637,304  | 342   | <i>HP3_left</i>   | <i>3a</i> | Bisulphite sequencing |
| 637,324    | 637,711  | 387   | <i>HP3_middle</i> | <i>3a</i> | Bisulphite sequencing |
| 637,980    | 638,341  | 361   | <i>HP3_right</i>  | <i>3a</i> | Bisulphite sequencing |
| 638,235    | 638,519  | 284   | <i>HP4_left</i>   | <i>3a</i> | Bisulphite sequencing |
| 638,522    | 638,871  | 349   | <i>HP4_middle</i> | <i>3a</i> | Bisulphite sequencing |
| 638,935    | 639,265  | 330   | <i>HP4_right</i>  | <i>3a</i> | Bisulphite sequencing |
| 647,567    | 647,888  | 321   | <i>HP5_left</i>   | <i>3b</i> | Bisulphite sequencing |
| 648,148    | 648,492  | 344   | <i>HP5_middle</i> | <i>3b</i> | Bisulphite sequencing |
| 650,009    | 650,153  | 144   | <i>HP5_right</i>  | <i>3b</i> | Bisulphite sequencing |
| 637,715    | 637,944  | 229   | <i>HP3-1</i>      | <i>3a</i> | ChIP-qPCR             |
| 637,106    | 637,324  | 218   | <i>HP3-2</i>      | <i>3a</i> | ChIP-qPCR             |
| 638,741    | 638,956  | 215   | <i>HP4-1</i>      | <i>3a</i> | ChIP-qPCR             |
| 638,338    | 638,489  | 151   | <i>HP4-2</i>      | <i>3a</i> | ChIP-qPCR             |
| 647,821    | 647,990  | 169   | <i>HP5-1</i>      | <i>3b</i> | ChIP-qPCR             |
| 648,790    | 648,980  | 190   | <i>HP5-2</i>      | <i>3b</i> | ChIP-qPCR             |
| 634,050    | 634,357  | 307   | <i>HP1a</i>       | <i>3a</i> | <i>McrBC</i>          |
| 634,627    | 634,969  | 342   | <i>HP1b</i>       | <i>3a</i> | <i>McrBC</i>          |
| 636,320    | 636,835  | 515   | <i>HP2a</i>       | <i>3a</i> | <i>McrBC</i>          |
| 635,018    | 635,562  | 544   | <i>HP2b</i>       | <i>3a</i> | <i>McrBC</i>          |
| 637,078    | 637,324  | 246   | <i>HP3a</i>       | <i>3a</i> | <i>McrBC</i>          |
| 637,995    | 638,261  | 266   | <i>HP3b</i>       | <i>3a</i> | <i>McrBC</i>          |
| 638,584    | 639,038  | 454   | <i>HP4a</i>       | <i>3a</i> | <i>McrBC</i>          |
| 638,237    | 638,584  | 347   | <i>HP4b</i>       | <i>3a</i> | <i>McrBC</i>          |
| 647,612    | 647,999  | 387   | <i>HP5a</i>       | <i>3b</i> | <i>McrBC</i>          |
| 649,755    | 650,059  | 304   | <i>HP5b</i>       | <i>3b</i> | <i>McrBC</i>          |

**Supplemental Table 5.** DNA methylation in wild type and *HP* lines assayed by sodium-bisulphite sequencing. Methylation levels are averaged across three intervals within each of the loci. The top row indicates the genotype with the targeted sequence analysed indicated in parentheses.

| Sequence Context | Col/Ler<br>[ <i>HP3</i> ] | Col/Ler<br>[ <i>HP4</i> ] | Col/Ler<br>[ <i>HP5</i> ] | <i>HP3</i> /Ler<br>[ <i>HP3</i> ] | <i>HP4</i> /Ler<br>[ <i>HP4</i> ] | <i>HP5</i> /Ler<br>[ <i>HP5</i> ] |
|------------------|---------------------------|---------------------------|---------------------------|-----------------------------------|-----------------------------------|-----------------------------------|
| CG               | 0.84                      | 0                         | 0.16                      | 42.32                             | 61.74                             | 23.48                             |
| CHG              | 0                         | 0.64                      | 0.98                      | 50.93                             | 59.64                             | 19.15                             |
| CHH              | 0.65                      | 0.49                      | 0.56                      | 12.71                             | 15.05                             | 6.10                              |
| Total            | 0.61                      | 0.47                      | 0.53                      | 20.34                             | 24.88                             | 11.16                             |

**Supplemental Table 6.** Sodium bisulphite sequencing analysis of DNA methylation in the 5' proximal interval of *HP3*.

| Position | Context | Col/Ler             |                  | <i>HP3</i> /Ler     |                  |
|----------|---------|---------------------|------------------|---------------------|------------------|
|          |         | Fraction methylated | Number of clones | Fraction methylated | Number of clones |
| 636,962  | CHH     | 0.055               | 18               | 0                   | 22               |
| 636,963  | CHH     | 0                   | 18               | 0                   | 22               |
| 636,968  | CHH     | 0                   | 18               | 0                   | 22               |
| 636,995  | CHH     | 0                   | 18               | 0.045               | 22               |
| 637,027  | CHH     | 0                   | 18               | 0                   | 22               |
| 637,034  | CHH     | 0                   | 18               | 0                   | 22               |
| 637,040  | CHH     | 0                   | 18               | 0                   | 22               |
| 637,055  | CHH     | 0                   | 18               | 0                   | 22               |
| 637,056  | CHH     | 0                   | 18               | 0                   | 22               |
| 637,057  | CHH     | 0                   | 18               | 0                   | 22               |
| 637,058  | CHH     | 0                   | 18               | 0                   | 22               |
| 637,060  | CHH     | 0                   | 18               | 0                   | 22               |
| 637,063  | CHH     | 0                   | 18               | 0                   | 22               |
| 637,067  | CHH     | 0                   | 18               | 0                   | 22               |
| 637,068  | CHH     | 0                   | 18               | 0                   | 22               |
| 637,075  | CHH     | 0                   | 17               | 0.045               | 22               |
| 637,078  | CHH     | 0.055               | 18               | 0.045               | 22               |
| 637,081  | CHH     | 0                   | 15               | 0.09                | 22               |
| 637,084  | CHH     | 0                   | 17               | 0.142               | 21               |
| 637,087  | CHH     | 0.055               | 18               | 0.09                | 22               |
| 637,094  | CHH     | 0                   | 18               | 0.181               | 22               |
| 637,100  | CHH     | 0                   | 18               | 0.272               | 22               |
| 637,118  | CHH     | 0                   | 18               | 0.227               | 22               |
| 637,124  | CHH     | 0                   | 18               | 0.363               | 22               |
| 637,125  | CHH     | 0                   | 18               | 0.409               | 22               |
| 637,127  | CHH     | 0                   | 18               | 0.318               | 22               |
| 637,142  | CHH     | 0                   | 18               | 0.38                | 21               |
| 637,143  | CHH     | 0                   | 18               | 0.285               | 21               |
| 637,153  | CHH     | 0                   | 18               | 0.363               | 22               |
| 637,161  | CHH     | 0                   | 16               | 0.363               | 22               |
| 637,165  | CHH     | 0                   | 16               | 0.318               | 22               |
| 637,169  | CHH     | 0.055               | 18               | 0.272               | 22               |
| 637,172  | CHH     | 0.055               | 18               | 0.227               | 22               |
| 637,177  | CHH     | 0                   | 18               | 0.181               | 22               |
| 637,185  | CHH     | 0                   | 18               | 0.045               | 22               |
| 637,186  | CHH     | 0                   | 18               | 0.045               | 22               |
| 637,203  | CHH     | 0.055               | 18               | 0.09                | 22               |
| 637,211  | CHH     | 0                   | 18               | 0.045               | 22               |
| 637,217  | CHH     | 0                   | 18               | 0.045               | 22               |
| 637,223  | CHH     | 0                   | 18               | 0                   | 22               |
| 637,279  | CHH     | 0                   | 17               | 0.1                 | 20               |
| 637,282  | CHH     | 0                   | 18               | 0.142               | 21               |
| 637,287  | CHH     | 0                   | 18               | 0.047               | 21               |

|         |     |       |    |       |    |
|---------|-----|-------|----|-------|----|
| 637,289 | CHH | 0     | 18 | 0.142 | 21 |
| 637,292 | CHH | 0     | 18 | 0.047 | 21 |
| 637,297 | CHH | 0     | 16 | 0     | 20 |
| 637,298 | CHH | 0     | 16 | 0.05  | 20 |
| 636,976 | CG  | 0.111 | 18 | 0.045 | 22 |
| 637,052 | CG  | 0     | 18 | 0     | 22 |
| 637,065 | CG  | 0     | 18 | 0     | 22 |
| 637,110 | CG  | 0     | 16 | 0.181 | 22 |
| 637,253 | CG  | 0     | 18 | 0.5   | 22 |
| 636,969 | CHG | 0     | 18 | 0     | 22 |
| 636,975 | CHG | 0     | 18 | 0     | 22 |
| 636,979 | CHG | 0     | 18 | 0     | 22 |
| 637,064 | CHG | 0     | 18 | 0     | 22 |
| 637,147 | CHG | 0     | 16 | 0.476 | 21 |
| 637,299 | CHG | 0     | 16 | 0.3   | 20 |

**Supplemental Table 7.** Sodium bisulphite sequencing analysis of DNA methylation in the central interval of *HP3*.

| Position | Context | Col/Ler             |                  | <i>HP3</i> /Ler     |                  |
|----------|---------|---------------------|------------------|---------------------|------------------|
|          |         | Fraction methylated | Number of clones | Fraction methylated | Number of clones |
| 637,311  | CHH     | 0                   | 19               | 0.076               | 26               |
| 637,322  | CHH     | 0                   | 19               | 0                   | 26               |
| 637,323  | CHH     | 0                   | 19               | 0.076               | 26               |
| 637,330  | CHH     | 0                   | 19               | 0                   | 26               |
| 637,336  | CHH     | 0                   | 19               | 0                   | 26               |
| 637,362  | CHH     | 0                   | 19               | 0                   | 26               |
| 637,363  | CHH     | 0                   | 19               | 0                   | 26               |
| 637,375  | CHH     | 0                   | 19               | 0.038               | 26               |
| 637,376  | CHH     | 0                   | 19               | 0.038               | 26               |
| 637,382  | CHH     | 0                   | 16               | 0.038               | 26               |
| 637,388  | CHH     | 0                   | 19               | 0.038               | 26               |
| 637,394  | CHH     | 0                   | 17               | 0.076               | 26               |
| 637,404  | CHH     | 0                   | 19               | 0.076               | 26               |
| 637,416  | CHH     | 0                   | 19               | 0.115               | 26               |
| 637,418  | CHH     | 0                   | 19               | 0.076               | 26               |
| 637,431  | CHH     | 0.058               | 17               | 0.076               | 26               |
| 637,437  | CHH     | 0                   | 19               | 0.076               | 26               |
| 637,440  | CHH     | 0                   | 19               | 0.076               | 26               |
| 637,484  | CHH     | 0                   | 19               | 0.153               | 26               |
| 637,485  | CHH     | 0.052               | 19               | 0.23                | 26               |
| 637,487  | CHH     | 0                   | 19               | 0.23                | 26               |
| 637,491  | CHH     | 0                   | 19               | 0.192               | 26               |
| 637,498  | CHH     | 0                   | 19               | 0                   | 26               |
| 637,499  | CHH     | 0                   | 19               | 0                   | 26               |
| 637,500  | CHH     | 0                   | 19               | 0.153               | 26               |
| 637,503  | CHH     | 0                   | 19               | 0.153               | 26               |
| 637,506  | CHH     | 0                   | 19               | 0.153               | 26               |
| 637,524  | CHH     | 0                   | 19               | 0.153               | 26               |
| 637,543  | CHH     | 0                   | 19               | 0.192               | 26               |
| 637,546  | CHH     | 0                   | 19               | 0.269               | 26               |
| 637,552  | CHH     | 0                   | 19               | 0.192               | 26               |
| 637,553  | CHH     | 0                   | 19               | 0.23                | 26               |
| 637,572  | CHH     | 0.052               | 19               | 0.115               | 26               |
| 637,598  | CHH     | 0                   | 19               | 0.307               | 26               |
| 637,612  | CHH     | 0                   | 19               | 0.346               | 26               |
| 637,622  | CHH     | 0                   | 19               | 0.24                | 25               |
| 637,626  | CHH     | 0.052               | 19               | 0.23                | 26               |
| 637,673  | CHH     | 0                   | 17               | 0.076               | 26               |
| 637,689  | CHH     | 0                   | 18               | 0.153               | 26               |
| 637,701  | CHH     | 0                   | 18               | 0.038               | 26               |
| 637,314  | CG      | 0                   | 19               | 0.153               | 26               |
| 637,339  | CG      | 0                   | 19               | 0.192               | 26               |
| 637,356  | CG      | 0                   | 19               | 0.461               | 26               |

|         |     |   |    |       |    |
|---------|-----|---|----|-------|----|
| 637,359 | CG  | 0 | 19 | 0.153 | 26 |
| 637,391 | CG  | 0 | 18 | 0.384 | 26 |
| 637,413 | CG  | 0 | 18 | 0.423 | 26 |
| 637,420 | CG  | 0 | 19 | 0.346 | 26 |
| 637,442 | CG  | 0 | 19 | 0.346 | 26 |
| 637,639 | CG  | 0 | 19 | 0.961 | 26 |
| 637,655 | CG  | 0 | 19 | 0.961 | 26 |
| 637,319 | CHG | 0 | 19 | 0     | 26 |
| 637,358 | CHG | 0 | 19 | 0.038 | 26 |
| 637,427 | CHG | 0 | 19 | 0.423 | 26 |
| 637,508 | CHG | 0 | 19 | 0.576 | 26 |
| 637,554 | CHG | 0 | 19 | 0.923 | 26 |
| 637,604 | CHG | 0 | 19 | 1     | 26 |
| 637,684 | CHG | 0 | 19 | 0.884 | 26 |

**Supplemental Table 8.** Sodium bisulphite sequencing analysis of DNA methylation in the 3' proximal interval of *HP3*.

| Position | Context | Col/Ler             |                  | <i>HP3</i> /Ler     |                  |
|----------|---------|---------------------|------------------|---------------------|------------------|
|          |         | Fraction methylated | Number of clones | Fraction methylated | Number of clones |
| 637,981  | CHH     | 0                   | 16               | 0                   | 16               |
| 637,985  | CHH     | 0                   | 16               | 0.25                | 16               |
| 637,989  | CHH     | 0                   | 16               | 0                   | 16               |
| 637,992  | CHH     | 0.062               | 16               | 0                   | 16               |
| 637,995  | CHH     | 0                   | 16               | 0.187               | 16               |
| 637,998  | CHH     | 0                   | 16               | 0.062               | 16               |
| 638,000  | CHH     | 0                   | 16               | 0.375               | 16               |
| 638,012  | CHH     | 0                   | 16               | 0                   | 16               |
| 638,028  | CHH     | 0                   | 16               | 0.187               | 16               |
| 638,051  | CHH     | 0                   | 16               | 0.187               | 16               |
| 638,057  | CHH     | 0                   | 16               | 0.187               | 16               |
| 638,060  | CHH     | 0                   | 16               | 0.125               | 16               |
| 638,069  | CHH     | 0                   | 16               | 0.187               | 16               |
| 638,077  | CHH     | 0                   | 16               | 0.133               | 15               |
| 638,080  | CHH     | 0                   | 16               | 0.062               | 16               |
| 638,092  | CHH     | 0                   | 16               | 0                   | 16               |
| 638,094  | CHH     | 0                   | 16               | 0.133               | 15               |
| 638,099  | CHH     | 0                   | 16               | 0                   | 16               |
| 638,114  | CHH     | 0                   | 16               | 0                   | 16               |
| 638,115  | CHH     | 0                   | 16               | 0.187               | 16               |
| 638,116  | CHH     | 0                   | 16               | 0.187               | 16               |
| 638,121  | CHH     | 0                   | 16               | 0.187               | 16               |
| 638,134  | CHH     | 0                   | 16               | 0.187               | 16               |
| 638,135  | CHH     | 0                   | 16               | 0.25                | 16               |
| 638,149  | CHH     | 0                   | 16               | 0.25                | 16               |
| 638,150  | CHH     | 0.062               | 16               | 0.25                | 16               |
| 638,155  | CHH     | 0                   | 16               | 0.25                | 16               |
| 638,157  | CHH     | 0.062               | 16               | 0.187               | 16               |
| 638,168  | CHH     | 0                   | 16               | 0.187               | 16               |
| 638,172  | CHH     | 0.062               | 16               | 0.125               | 16               |
| 638,181  | CHH     | 0                   | 16               | 0.312               | 16               |
| 638,185  | CHH     | 0                   | 16               | 0.375               | 16               |
| 638,187  | CHH     | 0                   | 16               | 0.375               | 16               |
| 638,200  | CHH     | 0                   | 16               | 0.312               | 16               |
| 638,207  | CHH     | 0                   | 16               | 0.375               | 16               |
| 638,209  | CHH     | 0                   | 16               | 0.437               | 16               |
| 638,226  | CHH     | 0                   | 16               | 0.25                | 16               |
| 638,233  | CHH     | 0                   | 16               | 0.062               | 16               |
| 638,234  | CHH     | 0                   | 16               | 0.25                | 16               |
| 638,237  | CHH     | 0                   | 16               | 0.062               | 16               |
| 638,280  | CHH     | 0                   | 16               | 0                   | 16               |
| 638,281  | CHH     | 0                   | 16               | 0.062               | 16               |
| 638,286  | CHH     | 0                   | 16               | 0                   | 16               |

|         |     |       |    |       |    |
|---------|-----|-------|----|-------|----|
| 638,301 | CHH | 0.062 | 16 | 0     | 16 |
| 638,310 | CHH | 0     | 15 | 0     | 16 |
| 638,330 | CHH | 0     | 16 | 0     | 16 |
| 638,146 | CG  | 0     | 16 | 0.937 | 16 |
| 638,164 | CG  | 0     | 16 | 0.937 | 16 |
| 638,174 | CG  | 0     | 16 | 1     | 16 |
| 638,231 | CG  | 0.062 | 16 | 0.812 | 16 |
| 638,339 | CG  | 0     | 16 | 0.066 | 15 |
| 638,039 | CHG | 0     | 16 | 0.687 | 16 |
| 638,190 | CHG | 0     | 16 | 0.937 | 16 |
| 638,247 | CHG | 0     | 16 | 0.812 | 16 |
| 638,257 | CHG | 0     | 16 | 0.875 | 16 |

**Supplemental Table 9.** Sodium bisulphite sequencing analysis of DNA methylation in the 5' proximal interval of *HP4*.

| Position | Context | Col/Ler             |                  | <i>HP4</i> /Ler     |                  |
|----------|---------|---------------------|------------------|---------------------|------------------|
|          |         | Fraction methylated | Number of clones | Fraction methylated | Number of clones |
| 638,237  | CHH     | 0                   | 29               | 0                   | 26               |
| 638,280  | CHH     | 0                   | 29               | 0                   | 26               |
| 638,281  | CHH     | 0.034               | 29               | 0                   | 26               |
| 638,286  | CHH     | 0                   | 29               | 0                   | 25               |
| 638,301  | CHH     | 0                   | 29               | 0                   | 26               |
| 638,310  | CHH     | 0                   | 29               | 0.038               | 26               |
| 638,330  | CHH     | 0                   | 29               | 0                   | 26               |
| 638,342  | CHH     | 0                   | 29               | 0.076               | 26               |
| 638,343  | CHH     | 0                   | 29               | 0.115               | 26               |
| 638,346  | CHH     | 0                   | 29               | 0.153               | 26               |
| 638,353  | CHH     | 0                   | 29               | 0.115               | 26               |
| 638,356  | CHH     | 0                   | 29               | 0.115               | 26               |
| 638,369  | CHH     | 0                   | 29               | 0.08                | 25               |
| 638,375  | CHH     | 0                   | 29               | 0.269               | 26               |
| 638,399  | CHH     | 0                   | 29               | 0.23                | 26               |
| 638,409  | CHH     | 0                   | 29               | 0.192               | 26               |
| 638,411  | CHH     | 0                   | 29               | 0.307               | 26               |
| 638,417  | CHH     | 0                   | 29               | 0.192               | 26               |
| 638,426  | CHH     | 0.034               | 29               | 0.384               | 26               |
| 638,429  | CHH     | 0                   | 29               | 0.346               | 26               |
| 638,431  | CHH     | 0                   | 29               | 0.384               | 26               |
| 638,438  | CHH     | 0                   | 29               | 0.346               | 26               |
| 638,446  | CHH     | 0                   | 29               | 0.23                | 26               |
| 638,450  | CHH     | 0                   | 29               | 0.307               | 26               |
| 638,455  | CHH     | 0                   | 29               | 0.192               | 26               |
| 638,458  | CHH     | 0                   | 29               | 0.23                | 26               |
| 638,477  | CHH     | 0                   | 29               | 0.153               | 26               |
| 638,486  | CHH     | 0                   | 29               | 0.23                | 26               |
| 638,489  | CHH     | 0                   | 29               | 0.269               | 26               |
| 638,491  | CHH     | 0                   | 29               | 0.192               | 26               |
| 638,501  | CHH     | 0                   | 29               | 0.269               | 26               |
| 638,503  | CHH     | 0.034               | 29               | 0.153               | 26               |
| 638,505  | CHH     | 0                   | 29               | 0.269               | 26               |
| 638,508  | CHH     | 0                   | 29               | 0.153               | 26               |
| 638,339  | CG      | 0                   | 29               | 0.576               | 26               |
| 638,391  | CG      | 0                   | 29               | 0.884               | 26               |
| 638,480  | CG      | 0                   | 28               | 0.807               | 26               |
| 638,247  | CHG     | 0                   | 29               | 0.038               | 26               |
| 638,257  | CHG     | 0                   | 29               | 0.04                | 25               |
| 638,357  | CHG     | 0                   | 29               | 0.884               | 26               |
| 638,390  | CHG     | 0                   | 28               | 0.576               | 26               |
| 638,400  | CHG     | 0.034               | 29               | 0.884               | 26               |
| 638,472  | CHG     | 0                   | 29               | 0.653               | 26               |

**Supplemental Table 10.** Sodium bisulphite sequencing analysis of DNA methylation in the central interval of *HP4*.

|          |         | Col/Ler             |                  | <i>HP4</i> /Ler     |                  |
|----------|---------|---------------------|------------------|---------------------|------------------|
| Position | Context | Fraction methylated | Number of clones | Fraction methylated | Number of clones |
| 638,524  | CHH     | 0                   | 23               | 0.14                | 22               |
| 638,532  | CHH     | 0                   | 23               | 0.18                | 22               |
| 638,537  | CHH     | 0                   | 23               | 0.18                | 22               |
| 638,539  | CHH     | 0.045               | 22               | 0.41                | 22               |
| 638,542  | CHH     | 0                   | 23               | 0.09                | 22               |
| 638,546  | CHH     | 0                   | 23               | 0.27                | 22               |
| 638,550  | CHH     | 0                   | 23               | 0.32                | 22               |
| 638,557  | CHH     | 0                   | 23               | 0.27                | 22               |
| 638,562  | CHH     | 0                   | 23               | 0.32                | 22               |
| 638,571  | CHH     | 0                   | 23               | 0.32                | 22               |
| 638,580  | CHH     | 0                   | 23               | 0.41                | 22               |
| 638,584  | CHH     | 0                   | 23               | 0.36                | 22               |
| 638,593  | CHH     | 0                   | 23               | 0.38                | 21               |
| 638,598  | CHH     | 0.043               | 23               | 0.27                | 22               |
| 638,609  | CHH     | 0                   | 23               | 0.45                | 22               |
| 638,621  | CHH     | 0                   | 23               | 0.09                | 22               |
| 638,626  | CHH     | 0                   | 23               | 0.18                | 22               |
| 638,628  | CHH     | 0                   | 23               | 0.09                | 22               |
| 638,637  | CHH     | 0                   | 23               | 0.09                | 22               |
| 638,639  | CHH     | 0                   | 23               | 0.14                | 22               |
| 638,640  | CHH     | 0                   | 23               | 0.23                | 22               |
| 638,651  | CHH     | 0                   | 23               | 0.27                | 22               |
| 638,668  | CHH     | 0.043               | 23               | 0.14                | 22               |
| 638,671  | CHH     | 0                   | 23               | 0.18                | 22               |
| 638,677  | CHH     | 0                   | 23               | 0.14                | 22               |
| 638,708  | CHH     | 0                   | 23               | 0.05                | 22               |
| 638,717  | CHH     | 0                   | 23               | 0.18                | 22               |
| 638,720  | CHH     | 0                   | 23               | 0.14                | 22               |
| 638,757  | CHH     | 0                   | 23               | 0.05                | 22               |
| 638,758  | CHH     | 0                   | 23               | 0.14                | 22               |
| 638,760  | CHH     | 0                   | 23               | 0.05                | 22               |
| 638,761  | CHH     | 0.043               | 23               | 0.14                | 22               |
| 638,763  | CHH     | 0                   | 23               | 0.18                | 22               |
| 638,764  | CHH     | 0                   | 23               | 0.27                | 22               |
| 638,773  | CHH     | 0                   | 23               | 0.18                | 22               |
| 638,778  | CHH     | 0                   | 23               | 0.1                 | 21               |
| 638,793  | CHH     | 0                   | 23               | 0.18                | 22               |
| 638,796  | CHH     | 0                   | 23               | 0.23                | 22               |
| 638,809  | CHH     | 0                   | 23               | 0.14                | 21               |
| 638,816  | CHH     | 0.043               | 23               | 0.09                | 22               |
| 638,817  | CHH     | 0.086               | 23               | 0.05                | 22               |
| 638,842  | CHH     | 0                   | 22               | 0                   | 22               |
| 638,843  | CHH     | 0                   | 22               | 0.09                | 22               |

|         |     |      |    |      |    |
|---------|-----|------|----|------|----|
| 638,850 | CHH | 0    | 22 | 0.05 | 22 |
| 638,858 | CHH | 0    | 23 | 0    | 22 |
| 638,859 | CHH | 0    | 23 | 0.09 | 22 |
| 638,861 | CHH | 0    | 23 | 0.09 | 22 |
| 638,862 | CHH | 0    | 23 | 0.05 | 22 |
| 638,735 | CG  | 0    | 23 | 0.91 | 22 |
| 638,739 | CG  | 0    | 23 | 0.82 | 22 |
| 638,766 | CG  | 0    | 23 | 0.95 | 22 |
| 638,864 | CG  | 0    | 23 | 0.95 | 22 |
| 638,595 | CHG | 0    | 23 | 0.82 | 22 |
| 638,602 | CHG | 0    | 23 | 0.95 | 22 |
| 638,617 | CHG | 0    | 23 | 0.73 | 22 |
| 638,734 | CHG | 0    | 23 | 0.82 | 22 |
| 638,770 | CHG | 0    | 23 | 0.77 | 22 |
| 638,774 | CHG | 0    | 23 | 0.95 | 22 |
| 638,802 | CHG | 0    | 23 | 0.82 | 22 |
| 638,868 | CHG | 0.09 | 22 | 0.41 | 22 |

**Supplemental Table 11.** Sodium bisulphite sequencing analysis of DNA methylation in the 3' proximal interval of *HP4*.

|          |         | Col/Ler             |                  | <i>HP4</i> /Ler     |                  |
|----------|---------|---------------------|------------------|---------------------|------------------|
| Position | Context | Fraction methylated | Number of clones | Fraction methylated | Number of clones |
| 638,955  | CHH     | 0                   | 23               | 0.59                | 22               |
| 638,973  | CHH     | 0                   | 23               | 0.636               | 22               |
| 638,987  | CHH     | 0                   | 23               | 0.181               | 22               |
| 638,992  | CHH     | 0                   | 22               | 0.181               | 22               |
| 639,001  | CHH     | 0                   | 22               | 0.318               | 22               |
| 639,008  | CHH     | 0                   | 23               | 0.09                | 22               |
| 639,009  | CHH     | 0                   | 23               | 0.09                | 22               |
| 639,029  | CHH     | 0                   | 23               | 0                   | 22               |
| 639,037  | CHH     | 0                   | 22               | 0                   | 22               |
| 639,038  | CHH     | 0                   | 23               | 0                   | 22               |
| 639,050  | CHH     | 0                   | 23               | 0                   | 22               |
| 639,059  | CHH     | 0                   | 23               | 0                   | 22               |
| 639,109  | CHH     | 0                   | 23               | 0                   | 22               |
| 639,110  | CHH     | 0                   | 22               | 0                   | 20               |
| 639,113  | CHH     | 0                   | 23               | 0.318               | 22               |
| 639,123  | CHH     | 0                   | 23               | 0.227               | 22               |
| 639,140  | CHH     | 0                   | 23               | 0                   | 22               |
| 639,141  | CHH     | 0                   | 23               | 0.045               | 22               |
| 639,148  | CHH     | 0                   | 23               | 0                   | 22               |
| 639,174  | CHH     | 0                   | 23               | 0                   | 22               |
| 639,185  | CHH     | 0                   | 23               | 0                   | 22               |
| 639,196  | CHH     | 0                   | 22               | 0                   | 22               |
| 639,197  | CHH     | 0.043               | 23               | 0.045               | 22               |
| 639,199  | CHH     | 0.086               | 23               | 0.047               | 21               |
| 639,201  | CHH     | 0                   | 23               | 0                   | 22               |
| 639,215  | CHH     | 0                   | 23               | 0                   | 21               |
| 639,217  | CHH     | 0                   | 23               | 0                   | 22               |
| 639,223  | CHH     | 0                   | 23               | 0                   | 21               |
| 639,229  | CHH     | 0                   | 23               | 0                   | 22               |
| 639,235  | CHH     | 0                   | 23               | 0.045               | 22               |
| 639,237  | CHH     | 0                   | 23               | 0                   | 22               |
| 639,252  | CHH     | 0.043               | 23               | 0                   | 22               |
| 639,257  | CHH     | 0                   | 23               | 0                   | 22               |
| 639,259  | CHH     | 0                   | 23               | 0                   | 22               |
| 638,939  | CG      | 0                   | 23               | 1                   | 22               |
| 639,006  | CG      | 0                   | 23               | 0.954               | 22               |
| 639,067  | CG      | 0                   | 23               | 0.045               | 22               |
| 639,153  | CG      | 0                   | 23               | 0.045               | 22               |
| 639,192  | CG      | 0                   | 23               | 0                   | 22               |
| 639,206  | CG      | 0                   | 23               | 0                   | 22               |
| 638,951  | CHG     | 0                   | 23               | 1                   | 22               |
| 638,995  | CHG     | 0                   | 23               | 0.863               | 22               |
| 639,152  | CHG     | 0                   | 23               | 0                   | 22               |

|         |     |   |    |       |    |
|---------|-----|---|----|-------|----|
| 639,160 | CHG | 0 | 23 | 0.181 | 22 |
| 639,240 | CHG | 0 | 23 | 0     | 22 |

**Supplemental Table 12.** Sodium bisulphite sequencing analysis of DNA methylation in the 5' proximal interval of *HP5*.

| Position | Context | Col/Ler             |                  | <i>HP5</i> /Ler     |                  |
|----------|---------|---------------------|------------------|---------------------|------------------|
|          |         | Fraction methylated | Number of clones | Fraction methylated | Number of clones |
| 647,581  | CHH     | 0                   | 24               | 0.041               | 24               |
| 647,592  | CHH     | 0                   | 24               | 0                   | 24               |
| 647,593  | CHH     | 0                   | 24               | 0                   | 24               |
| 647,598  | CHH     | 0.041               | 24               | 0                   | 24               |
| 647,603  | CHH     | 0                   | 24               | 0                   | 24               |
| 647,607  | CHH     | 0                   | 24               | 0                   | 24               |
| 647,612  | CHH     | 0                   | 24               | 0                   | 24               |
| 647,621  | CHH     | 0                   | 24               | 0                   | 24               |
| 647,634  | CHH     | 0                   | 24               | 0                   | 24               |
| 647,640  | CHH     | 0                   | 24               | 0                   | 24               |
| 647,644  | CHH     | 0                   | 24               | 0                   | 24               |
| 647,659  | CHH     | 0                   | 24               | 0                   | 24               |
| 647,673  | CHH     | 0                   | 24               | 0                   | 24               |
| 647,679  | CHH     | 0                   | 24               | 0                   | 24               |
| 647,685  | CHH     | 0                   | 24               | 0.041               | 24               |
| 647,702  | CHH     | 0                   | 24               | 0                   | 24               |
| 647,722  | CHH     | 0.041               | 24               | 0.041               | 24               |
| 647,731  | CHH     | 0                   | 24               | 0                   | 24               |
| 647,751  | CHH     | 0.041               | 24               | 0.083               | 24               |
| 647,755  | CHH     | 0                   | 24               | 0                   | 24               |
| 647,772  | CHH     | 0                   | 24               | 0                   | 24               |
| 647,774  | CHH     | 0                   | 24               | 0                   | 23               |
| 647,777  | CHH     | 0                   | 24               | 0                   | 24               |
| 647,781  | CHH     | 0                   | 24               | 0                   | 24               |
| 647,793  | CHH     | 0                   | 24               | 0                   | 24               |
| 647,797  | CHH     | 0                   | 24               | 0                   | 24               |
| 647,803  | CHH     | 0                   | 24               | 0                   | 24               |
| 647,817  | CHH     | 0                   | 24               | 0                   | 24               |
| 647,823  | CHH     | 0                   | 24               | 0                   | 24               |
| 647,825  | CHH     | 0.041               | 24               | 0                   | 24               |
| 647,836  | CHH     | 0                   | 24               | 0                   | 24               |
| 647,843  | CHH     | 0                   | 24               | 0                   | 24               |
| 647,856  | CHH     | 0                   | 24               | 0                   | 24               |
| 647,868  | CHH     | 0                   | 24               | 0                   | 24               |
| 647,879  | CHH     | 0                   | 24               | 0                   | 24               |
| 647,881  | CHH     | 0                   | 22               | 0.043               | 23               |
| 647,570  | CG      | 0                   | 24               | 0                   | 24               |
| 647,573  | CG      | 0                   | 24               | 0                   | 24               |
| 647,583  | CG      | 0                   | 24               | 0                   | 24               |
| 647,588  | CG      | 0                   | 24               | 0                   | 24               |
| 647,623  | CG      | 0                   | 24               | 0                   | 24               |
| 647,628  | CG      | 0                   | 24               | 0                   | 24               |
| 647,689  | CG      | 0                   | 23               | 0.125               | 24               |

|         |     |       |    |       |    |
|---------|-----|-------|----|-------|----|
| 647,734 | CG  | 0     | 24 | 0.083 | 24 |
| 647,742 | CG  | 0     | 24 | 0.041 | 24 |
| 647,765 | CG  | 0     | 24 | 0     | 24 |
| 647,785 | CG  | 0     | 24 | 0.083 | 24 |
| 647,829 | CG  | 0     | 24 | 0     | 24 |
| 647,859 | CG  | 0     | 24 | 0.041 | 24 |
| 647,866 | CG  | 0     | 24 | 0.083 | 24 |
| 647,874 | CG  | 0     | 24 | 0.083 | 24 |
| 647,587 | CHG | 0     | 24 | 0     | 24 |
| 647,741 | CHG | 0     | 24 | 0.083 | 24 |
| 647,757 | CHG | 0     | 24 | 0     | 24 |
| 647,764 | CHG | 0     | 24 | 0     | 24 |
| 647,810 | CHG | 0     | 24 | 0.041 | 24 |
| 647,828 | CHG | 0     | 24 | 0     | 24 |
| 647,848 | CHG | 0     | 24 | 0.083 | 24 |
| 647,858 | CHG | 0     | 24 | 0     | 24 |
| 647,873 | CHG | 0.083 | 24 | 0     | 24 |

**Supplemental Table 13.** Sodium bisulphite sequencing analysis of DNA methylation in the central interval of *HP5*.

| Position | Context | Col/Ler             |                  | <i>HP5</i> /Ler     |                  |
|----------|---------|---------------------|------------------|---------------------|------------------|
|          |         | Fraction methylated | Number of clones | Fraction methylated | Number of clones |
| 648,150  | CHH     | 0                   | 24               | 0.344               | 29               |
| 648,159  | CHH     | 0                   | 24               | 0.068               | 29               |
| 648,162  | CHH     | 0                   | 24               | 0.31                | 29               |
| 648,165  | CHH     | 0                   | 24               | 0.068               | 29               |
| 648,166  | CHH     | 0.041               | 24               | 0.068               | 29               |
| 648,189  | CHH     | 0                   | 23               | 0.103               | 29               |
| 648,192  | CHH     | 0                   | 24               | 0.172               | 29               |
| 648,204  | CHH     | 0                   | 24               | 0.275               | 29               |
| 648,208  | CHH     | 0                   | 24               | 0.172               | 29               |
| 648,211  | CHH     | 0                   | 24               | 0.241               | 29               |
| 648,213  | CHH     | 0                   | 24               | 0.275               | 29               |
| 648,249  | CHH     | 0                   | 24               | 0.275               | 29               |
| 648,260  | CHH     | 0                   | 24               | 0.034               | 29               |
| 648,274  | CHH     | 0.041               | 24               | 0.103               | 29               |
| 648,288  | CHH     | 0                   | 24               | 0.137               | 29               |
| 648,293  | CHH     | 0                   | 24               | 0.034               | 29               |
| 648,294  | CHH     | 0.041               | 24               | 0.068               | 29               |
| 648,313  | CHH     | 0                   | 24               | 0.206               | 29               |
| 648,338  | CHH     | 0                   | 24               | 0.068               | 29               |
| 648,345  | CHH     | 0                   | 24               | 0.137               | 29               |
| 648,346  | CHH     | 0                   | 23               | 0.137               | 29               |
| 648,354  | CHH     | 0                   | 24               | 0.068               | 29               |
| 648,355  | CHH     | 0                   | 24               | 0.103               | 29               |
| 648,395  | CHH     | 0                   | 24               | 0.206               | 29               |
| 648,449  | CHH     | 0                   | 24               | 0.137               | 29               |
| 648,456  | CHH     | 0                   | 24               | 0.103               | 29               |
| 648,462  | CHH     | 0                   | 22               | 0.034               | 29               |
| 648,465  | CHH     | 0                   | 23               | 0.103               | 29               |
| 648,478  | CHH     | 0                   | 24               | 0.137               | 29               |
| 648,484  | CHH     | 0                   | 24               | 0.206               | 29               |
| 648,486  | CHH     | 0                   | 22               | 0.137               | 29               |
| 648,245  | CG      | 0                   | 24               | 0.931               | 29               |
| 648,252  | CG      | 0                   | 24               | 0.965               | 29               |
| 648,276  | CG      | 0                   | 24               | 0.965               | 29               |
| 648,481  | CG      | 0                   | 24               | 0.931               | 29               |
| 648,490  | CG      | 0                   | 20               | 0.931               | 29               |
| 648,169  | CHG     | 0                   | 24               | 0.827               | 29               |
| 648,251  | CHG     | 0.041               | 24               | 0.758               | 29               |
| 648,348  | CHG     | 0                   | 24               | 0.931               | 29               |

**Supplemental Table 14.** Sodium bisulphite sequencing analysis of DNA methylation in the 3' proximal interval of *HP5*.

|          |         | Col/Ler             |                  | <i>HP5</i> /Ler     |                  |
|----------|---------|---------------------|------------------|---------------------|------------------|
| Position | Context | Fraction methylated | Number of clones | Fraction methylated | Number of clones |
| 650,011  | CHH     | 0                   | 24               | 0                   | 24               |
| 650,014  | CHH     | 0                   | 24               | 0                   | 24               |
| 650,017  | CHH     | 0                   | 24               | 0                   | 24               |
| 650,022  | CHH     | 0                   | 24               | 0                   | 24               |
| 650,030  | CHH     | 0                   | 24               | 0                   | 24               |
| 650,041  | CHH     | 0                   | 24               | 0                   | 24               |
| 650,043  | CHH     | 0.045               | 22               | 0.041               | 24               |
| 650,057  | CHH     | 0                   | 24               | 0                   | 24               |
| 650,059  | CHH     | 0                   | 24               | 0                   | 24               |
| 650,064  | CHH     | 0                   | 24               | 0                   | 24               |
| 650,069  | CHH     | 0                   | 24               | 0                   | 24               |
| 650,076  | CHH     | 0.041               | 24               | 0                   | 24               |
| 650,101  | CHH     | 0                   | 24               | 0                   | 23               |
| 650,104  | CHH     | 0                   | 24               | 0.041               | 24               |
| 650,108  | CHH     | 0                   | 24               | 0                   | 23               |
| 650,120  | CHH     | 0.041               | 24               | 0                   | 24               |
| 650,121  | CHH     | 0.041               | 24               | 0                   | 24               |
| 650,125  | CHH     | 0                   | 24               | 0.041               | 24               |
| 650,127  | CHH     | 0.043               | 23               | 0                   | 24               |
| 650,132  | CHH     | 0                   | 24               | 0                   | 23               |
| 650,139  | CHH     | 0                   | 24               | 0                   | 24               |
| 650,140  | CHH     | 0                   | 24               | 0                   | 24               |
| 650,142  | CHH     | 0                   | 24               | 0                   | 24               |
| 650,020  | CG      | 0                   | 20               | 0.083               | 24               |
| 650,024  | CG      | 0                   | 20               | 0.083               | 24               |
| 650,032  | CG      | 0.041               | 24               | 0                   | 24               |
| 650,036  | CG      | 0                   | 24               | 0.125               | 24               |
| 650,088  | CG      | 0                   | 24               | 0.041               | 24               |
| 650,099  | CG      | 0                   | 24               | 0                   | 24               |
| 650,144  | CG      | 0                   | 24               | 0                   | 24               |
| 650,070  | CHG     | 0                   | 24               | 0                   | 24               |
| 650,082  | CHG     | 0.041               | 24               | 0.083               | 24               |
| 650,087  | CHG     | 0                   | 24               | 0                   | 24               |
| 650,092  | CHG     | 0                   | 24               | 0.041               | 24               |
| 650,147  | CHG     | 0                   | 24               | 0                   | 24               |

**Supplemental Table 15.** Aligning read pairs for barcoded libraries generated from wild type or *met1* Col/Ler backcross individuals. The L lane indicates lane number. The barcode numbers correspond to adapter sequences described in (Rowan et al. 2015).

| Barcode | Genotype  | L | Matching reads | Genotype  | L | Matching reads | Genotype    | L | Matching reads | Genotype    | L | Matching reads |
|---------|-----------|---|----------------|-----------|---|----------------|-------------|---|----------------|-------------|---|----------------|
| 1       | Wild type | 1 | 2164637        | Wild type | 2 | 2060772        | <i>met1</i> | 1 | 3170175        | <i>met1</i> | 2 | 3002529        |
| 2       | Wild type | 1 | 2588529        | Wild type | 2 | 1555203        | <i>met1</i> | 1 | 2159598        | <i>met1</i> | 2 | 2477162        |
| 3       | Wild type | 1 | 1987316        | Wild type | 2 | 545028         | <i>met1</i> | 1 | 2707544        | <i>met1</i> | 2 | 2147938        |
| 4       | Wild type | 1 | 4204637        | Wild type | 2 | 1282210        | <i>met1</i> | 1 | 2250254        | <i>met1</i> | 2 | 2351340        |
| 5       | Wild type | 1 | 3116924        | Wild type | 2 | 1790925        | <i>met1</i> | 1 | 3593043        | <i>met1</i> | 2 | 2428440        |
| 6       | Wild type | 1 | 1989204        | Wild type | 2 | 1484266        | <i>met1</i> | 1 | 2049669        | <i>met1</i> | 2 | 1218619        |
| 7       | Wild type | 1 | 1918624        | Wild type | 2 | 1683554        | <i>met1</i> | 1 | 2535472        | <i>met1</i> | 2 | 5095730        |
| 8       | Wild type | 1 | 1446392        | Wild type | 2 | 785844         | <i>met1</i> | 1 | 1810268        | <i>met1</i> | 2 | 1175290        |
| 9       | Wild type | 1 | 1870901        | Wild type | 2 | 1301743        | <i>met1</i> | 1 | 2441510        | <i>met1</i> | 2 | 3038972        |
| 10      | Wild type | 1 | 1758096        | Wild type | 2 | 1902689        | <i>met1</i> | 1 | 2877161        | <i>met1</i> | 2 | 2706809        |
| 11      | Wild type | 1 | 2035284        | Wild type | 2 | 1496943        | <i>met1</i> | 1 | 2417339        | <i>met1</i> | 2 | 2031320        |
| 12      | Wild type | 1 | nd             | Wild type | 2 | 2896349        | <i>met1</i> | 1 | 2307554        | <i>met1</i> | 2 | 835646         |
| 13      | Wild type | 1 | 2560436        | Wild type | 2 | 2201788        | <i>met1</i> | 1 | 2708047        | <i>met1</i> | 2 | 3307178        |
| 14      | Wild type | 1 | 2922566        | Wild type | 2 | 2421638        | <i>met1</i> | 1 | 2645630        | <i>met1</i> | 2 | 2660823        |
| 15      | Wild type | 1 | 2891425        | Wild type | 2 | 879846         | <i>met1</i> | 1 | 2609484        | <i>met1</i> | 2 | 2251453        |
| 16      | Wild type | 1 | 1391410        | Wild type | 2 | 1656797        | <i>met1</i> | 1 | 2562448        | <i>met1</i> | 2 | 2089285        |
| 17      | Wild type | 1 | 1114564        | Wild type | 2 | 1384512        | <i>met1</i> | 1 | 1923146        | <i>met1</i> | 2 | 2345895        |
| 18      | Wild type | 1 | 2241842        | Wild type | 2 | 1204877        | <i>met1</i> | 1 | 1658224        | <i>met1</i> | 2 | 2023943        |
| 19      | Wild type | 1 | 2973766        | Wild type | 2 | 1068931        | <i>met1</i> | 1 | 1825071        | <i>met1</i> | 2 | 1056208        |
| 20      | Wild type | 1 | 1932439        | Wild type | 2 | 977777         | <i>met1</i> | 1 | 1816791        | <i>met1</i> | 2 | 2518009        |
| 21      | Wild type | 1 | 2090298        | Wild type | 2 | 844022         | <i>met1</i> | 1 | 1700792        | <i>met1</i> | 2 | 841221         |
| 22      | Wild type | 1 | 4492692        | Wild type | 2 | 1705999        | <i>met1</i> | 1 | 2235759        | <i>met1</i> | 2 | 2541795        |
| 23      | Wild type | 1 | 2191266        | Wild type | 2 | 2570535        | <i>met1</i> | 1 | 2261000        | <i>met1</i> | 2 | 1023723        |
| 24      | Wild type | 1 | 1155891        | Wild type | 2 | 1416504        | <i>met1</i> | 1 | 2526867        | <i>met1</i> | 2 | 2432502        |
| 25      | Wild type | 1 | 1428147        | Wild type | 2 | 1199289        | <i>met1</i> | 1 | 2158171        | <i>met1</i> | 2 | 2409352        |
| 26      | Wild type | 1 | 1985226        | Wild type | 2 | 1664774        | <i>met1</i> | 1 | 2451657        | <i>met1</i> | 2 | 2178667        |
| 27      | Wild type | 1 | na             | Wild type | 2 | 1488090        | <i>met1</i> | 1 | 2004866        | <i>met1</i> | 2 | 2619111        |
| 28      | Wild type | 1 | 2088609        | Wild type | 1 | na             | <i>met1</i> | 1 | 1699933        | <i>met1</i> | 2 | 2473398        |
| 29      | Wild type | 1 | 2611747        | Wild type | 2 | 1471263        | <i>met1</i> | 1 | 1940718        | <i>met1</i> | 2 | 1062757        |
| 30      | Wild type | 1 | 3340676        | Wild type | 2 | 2322220        | <i>met1</i> | 1 | 2190171        | <i>met1</i> | 2 | 1540056        |
| 31      | Wild type | 1 | 3338992        | Wild type | 2 | 2060935        | <i>met1</i> | 1 | 1860339        | <i>met1</i> | 2 | 1479292        |
| 32      | Wild type | 1 | 2686601        | Wild type | 2 | 2827665        | <i>met1</i> | 1 | 2800659        | <i>met1</i> | 2 | 1133247        |
| 33      | Wild type | 1 | 2682974        | Wild type | 2 | 2061516        | <i>met1</i> | 1 | 2266828        | <i>met1</i> | 2 | 2525547        |
| 34      | Wild type | 1 | 1389622        | Wild type | 2 | 1540792        | <i>met1</i> | 1 | 2776131        | <i>met1</i> | 2 | 1662479        |
| 35      | Wild type | 1 | 3705969        | Wild type | 2 | 2086016        | <i>met1</i> | 1 | 2873682        | <i>met1</i> | 2 | 2420455        |
| 36      | Wild type | 1 | 1887717        | Wild type | 2 | 2015764        | <i>met1</i> | 1 | 2500332        | <i>met1</i> | 2 | 2999133        |
| 37      | Wild type | 1 | 1483233        | Wild type | 2 | 2361585        | <i>met1</i> | 1 | 2740322        | <i>met1</i> | 2 | 3844824        |
| 38      | Wild type | 1 | na             | Wild type | 2 | 1312722        | <i>met1</i> | 1 | 2254464        | <i>met1</i> | 2 | 2215029        |
| 39      | Wild type | 1 | 1446717        | Wild type | 2 | 1269300        | <i>met1</i> | 1 | 1832327        | <i>met1</i> | 2 | 3024979        |
| 40      | Wild type | 1 | 2543107        | Wild type | 2 | 1594646        | <i>met1</i> | 1 | 2759495        | <i>met1</i> | 2 | 3088129        |

|    |           |   |         |           |   |         |      |   |         |      |   |         |
|----|-----------|---|---------|-----------|---|---------|------|---|---------|------|---|---------|
| 41 | Wild type | 1 | 3387336 | Wild type | 2 | 1976858 | met1 | 1 | 1655797 | met1 | 2 | 2251467 |
| 42 | Wild type | 1 | 2493455 | Wild type | 2 | 1422031 | met1 | 1 | 2319989 | met1 | 2 | 4418994 |
| 43 | Wild type | 1 | 1748579 | Wild type | 2 | 1462074 | met1 | 1 | 2210316 | met1 | 2 | 1085295 |
| 44 | Wild type | 1 | 3650649 | Wild type | 2 | 1998601 | met1 | 1 | 1974589 | met1 | 2 | 950514  |
| 45 | Wild type | 1 | 1821110 | Wild type | 2 | 1812669 | met1 | 1 | 2753440 | met1 | 2 | 1493787 |
| 46 | Wild type | 1 | 1821216 | Wild type | 2 | 878097  | met1 | 1 | 2512225 | met1 | 2 | 2232698 |
| 47 | Wild type | 1 | 2908437 | Wild type | 2 | 2350713 | met1 | 1 | 1903959 | met1 | 2 | 1616465 |
| 48 | Wild type | 1 | 2416552 | Wild type | 2 | 1384248 | met1 | 1 | 2275150 | met1 | 2 | 3774435 |
| 49 | Wild type | 1 | 1719335 | Wild type | 2 | 2172122 | met1 | 1 | 2941977 | met1 | 2 | 2426584 |
| 50 | Wild type | 1 | 2156315 | Wild type | 2 | 4537428 | met1 | 1 | 3503934 | met1 | 2 | 2496702 |
| 51 | Wild type | 1 | 1416440 | Wild type | 2 | 2140396 | met1 | 1 | 2427146 | met1 | 2 | 1605232 |
| 52 | Wild type | 1 | 2196961 | Wild type | 2 | 3425900 | met1 | 1 | 2558544 | met1 | 2 | 4060503 |
| 53 | Wild type | 1 | 1135996 | Wild type | 2 | 2530094 | met1 | 1 | 3253013 | met1 | 2 | 2225060 |
| 54 | Wild type | 1 | 1833930 | Wild type | 2 | 1927897 | met1 | 1 | 3158198 | met1 | 2 | 2041660 |
| 55 | Wild type | 1 | 1647142 | Wild type | 2 | 1492700 | met1 | 1 | 1812581 | met1 | 2 | 1777913 |
| 56 | Wild type | 1 | 1220085 | Wild type | 2 | 1856733 | met1 | 1 | 2181542 | met1 | 2 | 2510668 |
| 57 | Wild type | 1 | 1605413 | Wild type | 2 | 679399  | met1 | 1 | 1941123 | met1 | 2 | 692640  |
| 58 | Wild type | 1 | 1584600 | Wild type | 2 | 1512446 | met1 | 1 | 2206609 | met1 | 2 | 2508772 |
| 59 | Wild type | 1 | 4152993 | Wild type | 2 | 1029584 | met1 | 1 | 2340018 | met1 | 2 | 1498548 |
| 60 | Wild type | 1 | 2103623 | Wild type | 2 | 1697146 | met1 | 1 | 2414886 | met1 | 2 | 1305916 |
| 61 | Wild type | 1 | 2015782 | Wild type | 2 | 1925896 | met1 | 1 | 2140175 | met1 | 2 | 1540847 |
| 62 | Wild type | 1 | 2134326 | Wild type | 2 | 2858875 | met1 | 1 | 2024616 | met1 | 2 | 1735993 |
| 63 | Wild type | 1 | na      | Wild type | 2 | 2201584 | met1 | 1 | 2217303 | met1 | 2 | 2058730 |
| 64 | Wild type | 1 | 2407315 | Wild type | 2 | 1212943 | met1 | 1 | 1934972 | met1 | 2 | 1228237 |
| 65 | Wild type | 1 | 1772251 | Wild type | 2 | 1235452 | met1 | 1 | 1799592 | met1 | 2 | 1128288 |
| 66 | Wild type | 1 | 1560607 | Wild type | 2 | 1497192 | met1 | 1 | 2135377 | met1 | 2 | 1624373 |
| 67 | Wild type | 1 | 1898420 | Wild type | 2 | 1621869 | met1 | 1 | 1382135 | met1 | 2 | 907931  |
| 68 | Wild type | 1 | 2028896 | Wild type | 2 | 1888781 | met1 | 1 | 1939222 | met1 | 2 | 1689935 |
| 69 | Wild type | 1 | 1069605 | Wild type | 2 | 1172276 | met1 | 1 | 1050290 | met1 | 2 | 990786  |
| 70 | Wild type | 1 | 1313988 | Wild type | 2 | 576153  | met1 | 1 | 891333  | met1 | 2 | 1280779 |
| 71 | Wild type | 1 | 1141458 | Wild type | 2 | 1206109 | met1 | 1 | 2175817 | met1 | 2 | 1905720 |
| 72 | Wild type | 1 | 3293448 | Wild type | 2 | 1928217 | met1 | 1 | 1920273 | met1 | 2 | 1144275 |
| 73 | Wild type | 1 | 1972291 | Wild type | 2 | 1381342 | met1 | 1 | 1838425 | met1 | 2 | 914306  |
| 74 | Wild type | 1 | 2308834 | Wild type | 2 | 1044164 | met1 | 1 | 1750047 | met1 | 2 | 821499  |
| 75 | Wild type | 1 | 3098189 | Wild type | 2 | 1326670 | met1 | 1 | 2139737 | met1 | 2 | 475906  |
| 76 | Wild type | 1 | 3050744 | Wild type | 2 | 1612668 | met1 | 1 | 1492199 | met1 | 2 | 1532256 |
| 77 | Wild type | 1 | 2522386 | Wild type | 2 | 1228615 | met1 | 1 | 1614714 | met1 | 2 | 1082204 |
| 78 | Wild type | 1 | 1484280 | Wild type | 2 | 1153877 | met1 | 1 | 1864176 | met1 | 2 | 1035493 |
| 79 | Wild type | 1 | 2742049 | Wild type | 2 | 2110032 | met1 | 1 | 1736637 | met1 | 2 | 1156204 |
| 80 | Wild type | 1 | 2019910 | Wild type | 2 | 2002620 | met1 | 1 | 2076568 | met1 | 2 | 1427362 |
| 81 | Wild type | 1 | 1663779 | Wild type | 2 | 1317288 | met1 | 1 | 1567852 | met1 | 2 | 775735  |
| 82 | Wild type | 1 | 1772355 | Wild type | 2 | 1235414 | met1 | 1 | 1800542 | met1 | 2 | 1469182 |
| 83 | Wild type | 1 | 2604686 | Wild type | 2 | 1230285 | met1 | 1 | 2379990 | met1 | 2 | 1037338 |
| 84 | Wild type | 1 | 880122  | Wild type | 2 | 2508013 | met1 | 1 | 1896345 | met1 | 2 | 2302021 |

|    |           |   |         |           |   |         |             |   |         |             |   |         |
|----|-----------|---|---------|-----------|---|---------|-------------|---|---------|-------------|---|---------|
| 85 | Wild type | 1 | 775070  | Wild type | 2 | 1765791 | <i>met1</i> | 1 | 1917383 | <i>met1</i> | 2 | 1265965 |
| 86 | Wild type | 1 | 1711858 | Wild type | 2 | 2168744 | <i>met1</i> | 1 | 2324899 | <i>met1</i> | 2 | 856834  |
| 87 | Wild type | 1 | 1412918 | Wild type | 2 | 1438599 | <i>met1</i> | 1 | 1894324 | <i>met1</i> | 2 | 1575882 |
| 88 | Wild type | 1 | 1102423 | Wild type | 2 | 1388655 | <i>met1</i> | 1 | 2152417 | <i>met1</i> | 2 | 3432713 |
| 89 | Wild type | 1 | 1001510 | Wild type | 2 | 1714441 | <i>met1</i> | 1 | 2296608 | <i>met1</i> | 2 | 1711693 |
| 90 | Wild type | 1 | 3457096 | Wild type | 2 | 578887  | <i>met1</i> | 1 | 1177297 | <i>met1</i> | 2 | 1454286 |
| 91 | Wild type | 1 | 2540367 | Wild type | 2 | 1495746 | <i>met1</i> | 1 | 3193507 | <i>met1</i> | 2 | 928627  |
| 92 | Wild type | 1 | 3677498 | Wild type | 2 | 3091065 | <i>met1</i> | 1 | 2420734 | <i>met1</i> | 2 | 1968210 |
| 93 | Wild type | 1 | 4640036 | Wild type | 2 | 796801  | <i>met1</i> | 1 | 1378933 | <i>met1</i> | 2 | 2462571 |
| 94 | Wild type | 1 | 3143689 | Wild type | 2 | 1143858 | <i>met1</i> | 1 | 1816058 | <i>met1</i> | 2 | 1362111 |
| 95 | Wild type | 1 | 2999715 | Wild type | 2 | 718774  | <i>met1</i> | 1 | 1386873 | <i>met1</i> | 2 | 555990  |
| 96 | Wild type | 1 | 5417394 | Wild type | 2 | 3196324 | <i>met1</i> | 1 | 2097022 | <i>met1</i> | 2 | 999601  |

**Supplemental Table 16.** Crossover and double crossover numbers identified by low coverage sequencing of wild type (n=187) and *met1* (n=192) Col/Ler backcross populations. Total crossovers (COs) and double crossovers (DCOs) are listed, and by chromosome. As *met1-3* was backcrossed from Col into Ler, in order to generate the *met1* Col/Ler F<sub>1</sub> line used for genetic mapping, there is an approximately 5.15 Mb Col/Col introgressed region surrounding *met1* on the south arm of chromosome 5. For this reason artefactual crossovers are identified on chromosome 5 in *met1* and therefore were excluded from subsequent analysis. To test whether wild type and *met1* crossovers were significantly different we used a general linear model (GLM) assuming a negative binomial distribution and *P* values for each comparison are listed.

|      | COs       |             | DCOs      |             | GLM <i>P</i> |       |
|------|-----------|-------------|-----------|-------------|--------------|-------|
|      | Wild type | <i>met1</i> | Wild type | <i>met1</i> | COs          | DCOs  |
| Chr1 | 253       | 217         | 105       | 66          | 0.966        | 0.566 |
| Chr2 | 184       | 163         | 44        | 35          | 0.972        | 0.798 |
| Chr3 | 174       | 188         | 45        | 57          | 0.962        | 0.567 |
| Chr4 | 177       | 137         | 45        | 25          | 0.971        | 0.647 |
| Chr5 | 218       | 378         | 77        | 212         | 0.748        | 0.792 |
| All  | 1,006     | 1,083       | 316       | 395         | 0.877        | 0.601 |

**Supplemental Table 17.** *l1b* genetic distance in wild type, meiotic recombination and DNA methylation mutants. Genetic distances (cM) were calculated as  $2 \times (100 \times (\text{eYFP alone} / \text{adjusted total}))$  (Yelina et al. 2012, 2013).

| Genotype                       | Pollen (total) | Pollen (adjusted total) | eYFP alone | cM   |
|--------------------------------|----------------|-------------------------|------------|------|
| Col                            | 10,000         | 8,167                   | 309        | 7.6  |
| Col                            | 10,000         | 7,900                   | 279        | 7.1  |
| Col                            | 10,000         | 8,087                   | 326        | 8.1  |
| <i>zip4-2</i>                  | 9,746          | 4,109                   | 47         | 2.3  |
| <i>zip4-2</i>                  | 8,602          | 2,943                   | 35         | 2.4  |
| <i>zip4-2</i>                  | 7,872          | 2,975                   | 24         | 1.6  |
| <i>met1-3/+</i>                | 10,000         | 6,324                   | 379        | 12   |
| <i>met1-3/+</i>                | 10,000         | 6,342                   | 343        | 10.8 |
| <i>met1-3/+</i>                | 10,000         | 6,546                   | 360        | 11   |
| <i>met1-3/+</i>                | 10,000         | 6,166                   | 356        | 11.5 |
| <i>met1-3/+</i>                | 10,000         | 3,881                   | 205        | 10.6 |
| <i>met1-3/+ zip4-2</i>         | 10,000         | 4,104                   | 55         | 2.7  |
| <i>met1-3/+ zip4-2</i>         | 10,000         | 4,180                   | 65         | 3.1  |
| <i>met1-3/+ zip4-2</i>         | 10,000         | 4,313                   | 52         | 2.4  |
| <i>fancm-1</i>                 | 10,190         | 7,327                   | 681        | 18.6 |
| <i>fancm-1</i>                 | 10,000         | 7,976                   | 559        | 14   |
| <i>fancm-1</i>                 | 10,000         | 8,848                   | 725        | 16.4 |
| <i>fancm-1 zip4-2</i>          | 10,000         | 7,283                   | 590        | 16.2 |
| <i>fancm-1 zip4-2</i>          | 10,000         | 7,142                   | 554        | 15.5 |
| <i>fancm-1 zip4-2</i>          | 10,000         | 7,986                   | 677        | 17   |
| <i>fancm-1 met1-3/+</i>        | 10,000         | 6,900                   | 695        | 20.1 |
| <i>fancm-1 met1-3/+</i>        | 10,000         | 6,367                   | 607        | 19.1 |
| <i>fancm-1 met1-3/+</i>        | 4,067          | 2,439                   | 197        | 16.2 |
| <i>fancm-1 met1-3/+</i>        | 7,051          | 5,320                   | 489        | 18.4 |
| <i>fancm-1 met1-3/+</i>        | 4,695          | 3,111                   | 298        | 19.2 |
| <i>fancm-1 met1-3/+ zip4-2</i> | 10,000         | 7,126                   | 554        | 15.5 |
| <i>fancm-1 met1-3/+ zip4-2</i> | 10,000         | 4,709                   | 342        | 14.5 |
| <i>fancm-1 met1-3/+ zip4-2</i> | 5,664          | 3,392                   | 206        | 12.1 |
| <i>fancm-1 met1-3/+ zip4-2</i> | 5,293          | 3,466                   | 220        | 12.7 |
| <i>fancm-1 met1-3/+ zip4-2</i> | 10,000         | 5,546                   | 281        | 10.1 |

**Supplemental Table 18.** *CEN3* genetic distance in wild type, meiotic recombination and DNA methylation mutants. Genetic distances, in cM, were calculated as  $2 \times (100 \times (\text{eYFP alone} / \text{adjusted total}))$  (Yelina et al. 2012, 2013).

| Genotype                       | Pollen (total) | Pollen (adjusted total) | eYFP alone | cM   |
|--------------------------------|----------------|-------------------------|------------|------|
| Col                            | 10,000         | 7,556                   | 445        | 11.8 |
| Col                            | 10,000         | 7,372                   | 384        | 10.4 |
| Col                            | 10,000         | 7,192                   | 402        | 11.2 |
| <i>zip4-2</i>                  | 22,330         | 9,977                   | 74         | 1.5  |
| <i>zip4-2</i>                  | 17,301         | 6,109                   | 41         | 1.3  |
| <i>zip4-2</i>                  | 29,044         | 11,964                  | 88         | 1.5  |
| <i>met1-3/+</i>                | 10,000         | 7,244                   | 53         | 1.5  |
| <i>met1-3/+</i>                | 10,000         | 8,619                   | 70         | 1.6  |
| <i>met1-3/+</i>                | 10,000         | 9,240                   | 76         | 1.6  |
| <i>met1-3/+</i>                | 10,000         | 7,557                   | 58         | 1.5  |
| <i>met1-3/+</i>                | 10,000         | 6,445                   | 66         | 2    |
| <i>met1-3/+ zip4-2</i>         | 10,000         | 4,741                   | 29         | 1.2  |
| <i>met1-3/+ zip4-2</i>         | 10,000         | 4,589                   | 30         | 1.3  |
| <i>met1-3/+ zip4-2</i>         | 10,000         | 4,731                   | 28         | 1.2  |
| <i>fancm-1</i>                 | 10,000         | 5,859                   | 474        | 16.2 |
| <i>fancm-1</i>                 | 10,000         | 7,315                   | 481        | 13.2 |
| <i>fancm-1</i>                 | 10,000         | 7,519                   | 459        | 12.2 |
| <i>fancm-1 zip4-2</i>          | 10,000         | 6,899                   | 257        | 7.5  |
| <i>fancm-1 zip4-2</i>          | 10,000         | 6,673                   | 263        | 7.9  |
| <i>fancm-1 zip4-2</i>          | 10,000         | 6,946                   | 259        | 7.5  |
| <i>fancm-1 met1-3/+</i>        | 10,000         | 5,744                   | 215        | 7.5  |
| <i>fancm-1 met1-3/+</i>        | 10,000         | 6,680                   | 264        | 7.9  |
| <i>fancm-1 met1-3/+</i>        | 10,000         | 6,542                   | 248        | 7.6  |
| <i>fancm-1 met1-3/+</i>        | 10,000         | 6,953                   | 271        | 7.8  |
| <i>fancm-1 met1-3/+</i>        | 10,000         | 6,925                   | 294        | 8.5  |
| <i>fancm-1 met1-3/+</i>        | 10,000         | 7,199                   | 307        | 8.5  |
| <i>fancm-1 met1-3/+ zip4-2</i> | 10,000         | 6,142                   | 180        | 5.9  |
| <i>fancm-1 met1-3/+ zip4-2</i> | 10,000         | 6,592                   | 201        | 6.1  |
| <i>fancm-1 met1-3/+ zip4-2</i> | 10,000         | 5,396                   | 145        | 5.4  |
| <i>fancm-1 met1-3/+ zip4-2</i> | 10,000         | 7,615                   | 234        | 6.1  |
| <i>fancm-1 met1-3/+ zip4-2</i> | 10,000         | 5,221                   | 156        | 6    |
| <i>fancm-1 met1-3/+ zip4-2</i> | 10,000         | 7,036                   | 187        | 5.3  |
| <i>fancm-1 met1-3/+ zip4-2</i> | 10,000         | 5,170                   | 121        | 4.7  |
| <i>fancm-1 met1-3/+ zip4-2</i> | 10,000         | 6,674                   | 207        | 6.2  |

**Supplemental Table 19.** Tetrad analysis of genetic distance and crossover interference in wild type and *met1*. A-L indicate tetrads with different numbers of crossovers between FTLs: non-crossover (NCO; A), single crossover interval 1 (SCO-I1; B), single crossover interval 2 (SCO-I2; C), two strand double crossover (2st DCO; D), three strand double crossover a (3st DCOa; E), three strand double crossover b (3st DCOb; F), four strand double strand crossover (4st DCO; G), non-parental ditype interval 1, non-crossover interval 2 (NPD-I1 NCO-I2; H), non-crossover interval 1, non-parental ditype interval 2 (NCO-I1 NPD-I2; I), non-parental ditype interval 1, single crossover interval 2 (NPD-I1 SCO-I2; J), single crossover interval 1, non-parental ditype interval 2 (SCO-I1 NPD-I2; K) and non-parental ditype interval 1, non-parental ditype interval 2 (NPD-I1 NPD-I2; L) as in (Berchowitz and Copenhaver 2008).

| Tetrad class                    | <i>l1bc</i><br>Wild type | <i>l1bc</i><br><i>met1</i> | <i>l5ab</i><br>Wild type | <i>l5ab</i><br><i>met1/+</i> |
|---------------------------------|--------------------------|----------------------------|--------------------------|------------------------------|
| A NCO                           | 8,384                    | 5,394                      | 3,196                    | 2,385                        |
| B SCO-I1                        | 1,711                    | 1,715                      | 4,296                    | 4,718                        |
| C SCO-I2                        | 4,255                    | 3,663                      | 2,490                    | 2,401                        |
| D 2st DCO                       | 74                       | 91                         | 181                      | 256                          |
| E 3st DCOa                      | 67                       | 95                         | 145                      | 285                          |
| F 3st DCOb                      | 73                       | 97                         | 161                      | 280                          |
| G 4st DCO                       | 63                       | 111                        | 142                      | 255                          |
| H NPD-I1 NCO-I2                 | 9                        | 11                         | 84                       | 138                          |
| I NCO-I1 NPD-I2                 | 64                       | 80                         | 25                       | 29                           |
| J NPD-I1 SCO-I2                 | 1                        | 0                          | 11                       | 13                           |
| K SCO-I1 NPD-I2                 | 0                        | 2                          | 2                        | 14                           |
| L NPD-I1 NPD-I2                 | 0                        | 0                          | 0                        | 0                            |
| Total                           | 14,701                   | 11,259                     | 10,733                   | 10,774                       |
|                                 |                          |                            |                          |                              |
| Genetic distance/Interference   | <i>l1bc</i><br>Wild type | <i>l1bc</i><br><i>met1</i> | <i>l5ab</i><br>Wild type | <i>l5ab</i><br><i>met1/+</i> |
| <i>l1b</i> cM                   | 6.97                     | 9.67                       | 25.61                    | 31.16                        |
| <i>l1c</i> cM                   | 16.72                    | 20.20                      | 15.34                    | 17.39                        |
| <i>l1b</i> w/o adjacent CO, cM  | 8.73                     | 12.51                      | 31.68                    | 38.30                        |
| <i>l1b</i> with adjacent CO, cM | 3.08                     | 4.78                       | 11.04                    | 16.53                        |
| Interference ratio              | 0.35                     | 0.38                       | 0.35                     | 0.43                         |

**Supplemental Table 20.** Genetic distances of *CEN3* and *420* in wild type naïve and *met1* backgrounds. Genotype indicates that of the female parent crossed to *420-CEN3*.

| <i>CEN3</i> (cM) | <i>420</i> (cM) | Genotype          | BS-seq | <i>CEN3</i> cM Group |
|------------------|-----------------|-------------------|--------|----------------------|
| 10.6             | 21.2            | Col-0 naïve       | no     | n/a                  |
| 12.3             | 21.8            | Col-0 naïve       | no     | n/a                  |
| 11.9             | 20.0            | Col-0 naïve       | no     | n/a                  |
| 11.3             | 19.4            | Col-0 naïve       | no     | n/a                  |
| 11.1             | n/a             | Col-0 naïve       | no     | n/a                  |
| 11.0             | 19.8            | Col-0 naïve       | yes    | n/a                  |
| 10.9             | n/a             | Col-0 naïve       | no     | n/a                  |
| 8.6              | 28.3            | <i>met1-3</i> -/+ | yes    | 1                    |
| 8.2              | 26.8            | <i>met1-3</i> -/+ | yes    | 1                    |
| 8.1              | 28.0            | <i>met1-3</i> -/+ | yes    | 1                    |
| 5.7              | 26.5            | <i>met1-3</i> -/+ | yes    | 2                    |
| 5.7              | 31.2            | <i>met1-3</i> -/+ | no     | n/a                  |
| 5.4              | 29.2            | <i>met1-3</i> -/+ | yes    | 2                    |
| 5.2              | 29.5            | <i>met1-3</i> -/+ | yes    | 2                    |
| 4.6              | 27.1            | <i>met1-3</i> -/+ | no     | n/a                  |
| 4.5              | 29.0            | <i>met1-3</i> -/+ | no     | n/a                  |
| 4.4              | 30.8            | <i>met1-3</i> -/+ | yes    | 3                    |
| 4.3              | 30.6            | <i>met1-3</i> -/+ | yes    | 3                    |
| 4.1              | 27.6            | <i>met1-3</i> -/+ | no     | n/a                  |
| 4.0              | 28.3            | <i>met1-3</i> -/+ | yes    | 3                    |
| 3.8              | n/a             | <i>met1-3</i> -/+ | no     | n/a                  |
| 3.7              | 33.1            | <i>met1-3</i> -/+ | yes    | 4                    |
| 3.1              | 27.8            | <i>met1-3</i> -/+ | yes    | 4                    |
| 2.5              | 28.7            | <i>met1-3</i> -/+ | no     | n/a                  |
| 2.4              | 28.3            | <i>met1-3</i> -/- | no     | n/a                  |
| 2.2              | 29.8            | <i>met1-3</i> -/+ | yes    | 5                    |
| 2.1              | 26.7            | <i>met1-3</i> -/- | no     | n/a                  |
| 2.1              | 29.9            | <i>met1-3</i> -/- | no     | n/a                  |
| 2.0              | 32.6            | <i>met1-3</i> -/+ | yes    | 5                    |
| 1.9              | 32.4            | <i>met1-3</i> -/+ | yes    | 5                    |
| 1.3              | 31.1            | <i>met1-3</i> -/- | no     | n/a                  |

**Supplemental Table 21.** *CEN3* recombination data in wild type and *met1* backgrounds. For wild type samples a mixture of flow cytometry (rows 1-4) and tetrad (rows 5-7) are shown. Flow cytometry data was used to calculate genetic distance as  $2 \times (100 \times (\text{eYFP alone} / \text{adjusted total}))$  (Yelina et al. 2012, 2013). *CEN3* cM was calculated from tetrad data as:  $(\frac{1}{2} \text{PD} + 3 \text{NPD}) / \text{Total}$ .

| Genotype       | Total tetrads | PD  | NPD | Pollen (adjusted total) | YFP | <i>CEN3</i> (cM) |
|----------------|---------------|-----|-----|-------------------------|-----|------------------|
| Wild type      | 1,000         | 225 | 0   |                         |     | 11.3             |
| Wild type      | 1,014         | 208 | 3   |                         |     | 11.1             |
| Wild type      | 1,004         | 221 | 0   |                         |     | 11.0             |
| Wild type      | 1,085         | 236 | 0   |                         |     | 10.9             |
| Wild type      |               |     |     | 8,333                   | 441 | 10.6             |
| Wild type      |               |     |     | 8,363                   | 514 | 12.3             |
| Wild type      |               |     |     | 7,884                   | 469 | 11.9             |
| <i>met1/+</i>  | 1,163         | 201 | 0   |                         |     | 8.6              |
| <i>met1/+</i>  | 1,018         | 167 | 0   |                         |     | 8.2              |
| <i>met1/+</i>  | 1,039         | 162 | 1   |                         |     | 8.1              |
| <i>met1/+</i>  | 1,087         | 119 | 1   |                         |     | 5.7              |
| <i>met1/+</i>  | 965           | 110 | 0   |                         |     | 5.7              |
| <i>met1/+</i>  | 1,026         | 111 | 0   |                         |     | 5.4              |
| <i>met1/+</i>  | 1,299         | 136 | 0   |                         |     | 5.2              |
| <i>met1/+</i>  | 1,045         | 97  | 0   |                         |     | 4.6              |
| <i>met1/+</i>  | 1,001         | 85  | 1   |                         |     | 4.5              |
| <i>met1/+</i>  | 809           | 53  | 3   |                         |     | 4.4              |
| <i>met1/+</i>  | 1,066         | 91  | 0   |                         |     | 4.3              |
| <i>met1/+</i>  | 1,014         | 78  | 1   |                         |     | 4.1              |
| <i>met1/+</i>  | 923           | 73  | 0   |                         |     | 4.0              |
| <i>met1/+</i>  | 907           | 69  | 0   |                         |     | 3.8              |
| <i>met1/+</i>  | 900           | 66  | 0   |                         |     | 3.7              |
| <i>met1/+</i>  | 1,191         | 74  | 0   |                         |     | 3.1              |
| <i>met1/+</i>  | 1,095         | 49  | 1   |                         |     | 2.5              |
| <i>met1/+</i>  | 906           | 43  | 0   |                         |     | 2.4              |
| <i>met1/+</i>  | 1,000         | 43  | 0   |                         |     | 2.2              |
| <i>met1-/-</i> | 876           | 36  | 0   |                         |     | 2.1              |
| <i>met1-/-</i> | 750           | 31  | 0   |                         |     | 2.1              |
| <i>met1/+</i>  | 1,032         | 41  | 0   |                         |     | 2.0              |
| <i>met1-/-</i> | 864           | 26  | 1   |                         |     | 1.9              |
| <i>met1-/-</i> | 818           | 21  | 0   |                         |     | 1.3              |

**Supplemental Table 22.** 420 recombination data in wild type and *met1* backgrounds. 420 cM were calculated using the formula:  $100 \times (1 - [1 - 2(N_G + N_R)/N_T]^{1/2})$ , where  $N_G$  is a number of green-alone fluorescent seeds,  $N_R$  is a number of red-alone fluorescent seed and  $N_T$  is the total number of seeds counted.

| Genotype       | Green-alone | Red-alone | Both red and green | Neither red or green | Total | 420 cM |
|----------------|-------------|-----------|--------------------|----------------------|-------|--------|
| Wild type      | 280         | 253       | 2,014              | 496                  | 3,043 | 19.4   |
| Wild type      | 244         | 252       | 1,845              | 446                  | 2,787 | 19.8   |
| Wild type      | 245         | 239       | 1,651              | 418                  | 2,553 | 21.2   |
| Wild type      | 272         | 215       | 1,637              | 388                  | 2,512 | 21.8   |
| Wild type      | 221         | 222       | 1,584              | 435                  | 2,462 | 20.0   |
| <i>met1/+</i>  | 330         | 313       | 1,637              | 368                  | 2,648 | 28.3   |
| <i>met1/+</i>  | 317         | 360       | 1,830              | 414                  | 2,921 | 26.8   |
| <i>met1/+</i>  | 311         | 380       | 1,781              | 401                  | 2,873 | 28.0   |
| <i>met1/+</i>  | 316         | 299       | 1,693              | 369                  | 2,677 | 26.5   |
| <i>met1/+</i>  | 344         | 339       | 1,585              | 325                  | 2,593 | 31.2   |
| <i>met1/+</i>  | 337         | 329       | 1,664              | 343                  | 2,673 | 29.2   |
| <i>met1/+</i>  | 327         | 347       | 1,672              | 333                  | 2,679 | 29.5   |
| <i>met1/+</i>  | 317         | 310       | 1,697              | 353                  | 2,677 | 27.1   |
| <i>met1/+</i>  | 300         | 324       | 1,576              | 319                  | 2,519 | 29.0   |
| <i>met1/+</i>  | 298         | 299       | 1,413              | 284                  | 2,294 | 30.8   |
| <i>met1/+</i>  | 328         | 336       | 1,579              | 316                  | 2,559 | 30.6   |
| <i>met1/+</i>  | 362         | 339       | 1,855              | 391                  | 2,947 | 27.6   |
| <i>met1/+</i>  | 349         | 349       | 1,795              | 380                  | 2,873 | 28.3   |
| <i>met1/+</i>  | 365         | 348       | 1,576              | 292                  | 2,581 | 33.1   |
| <i>met1/+</i>  | 280         | 311       | 1,488              | 393                  | 2,472 | 27.8   |
| <i>met1/+</i>  | 349         | 337       | 1,733              | 368                  | 2,787 | 28.7   |
| <i>met1-/-</i> | 317         | 364       | 1,750              | 369                  | 2,800 | 28.3   |
| <i>met1/+</i>  | 340         | 372       | 1,766              | 326                  | 2,804 | 29.8   |
| <i>met1-/-</i> | 317         | 323       | 1,748              | 377                  | 2,765 | 26.7   |
| <i>met1-/-</i> | 352         | 333       | 1,669              | 338                  | 2,692 | 29.9   |
| <i>met1/+</i>  | 343         | 338       | 1,517              | 297                  | 2,495 | 32.6   |
| <i>met1/+</i>  | 364         | 368       | 1,650              | 313                  | 2,695 | 32.4   |
| <i>met1-/-</i> | 361         | 394       | 1,757              | 363                  | 2,875 | 31.1   |

**Supplemental Table 23.** Coverage of cytosines in CG, CHG and CHH contexts for each individual bisulfite sequenced.

| Genotype                  | CG read number | CG coverage | CHG read number | CHG coverage | CHH read number | CHH coverage |
|---------------------------|----------------|-------------|-----------------|--------------|-----------------|--------------|
| <i>420-CEN3</i> , naïve   | 67,989,599     | 12.21       | 70,844,535      | 11.63        | 379,159,928     | 12.15        |
| <i>met1/+</i>             | 100,645,548    | 18.08       | 106,300,353     | 17.44        | 572,857,484     | 18.36        |
| <i>420-CEN3 met1/+ 1</i>  | 58,358,586     | 10.48       | 60,662,034      | 9.95         | 334,707,521     | 10.73        |
| <i>420-CEN3 met1/+ 2</i>  | 115,238,981    | 20.70       | 120,324,368     | 19.75        | 657,789,802     | 21.08        |
| <i>420-CEN3 met1/+ 3</i>  | 91,805,992     | 16.49       | 96,132,919      | 15.78        | 522,766,903     | 16.76        |
| <i>420-CEN3 met1/+ 4</i>  | 98,958,507     | 17.77       | 104,362,480     | 17.13        | 556,289,421     | 17.83        |
| <i>420-CEN3 met1/+ 5</i>  | 106,877,268    | 19.20       | 110,983,196     | 18.21        | 606,873,835     | 19.45        |
| <i>420-CEN3 met1/+ 6</i>  | 75,748,912     | 13.61       | 79,443,683      | 13.04        | 425,283,636     | 13.63        |
| <i>420-CEN3 met1/+ 7</i>  | 55,370,857     | 9.94        | 57,592,023      | 9.45         | 318,107,079     | 10.20        |
| <i>420-CEN3 met1/+ 8</i>  | 65,347,854     | 11.74       | 68,474,126      | 11.24        | 365,048,599     | 11.70        |
| <i>420-CEN3 met1/+ 9</i>  | 78,756,470     | 14.15       | 81,882,645      | 13.44        | 443,145,370     | 14.20        |
| <i>420-CEN3 met1/+ 10</i> | 54,748,630     | 9.83        | 68,474,126      | 11.24        | 312,062,139     | 10.00        |
| <i>420-CEN3 met1/+ 11</i> | 73,802,870     | 13.26       | 77,006,790      | 12.64        | 418,560,009     | 13.42        |
| <i>420-CEN3 met1/+ 12</i> | 60,483,494     | 10.86       | 63,152,124      | 10.36        | 339,995,012     | 10.90        |
| <i>420-CEN3 met1/+ 13</i> | 65,987,906     | 11.85       | 69,007,502      | 11.32        | 373,161,158     | 11.96        |
| <i>420-CEN3 met1/+ 14</i> | 8,2071,448     | 14.74       | 85,440,245      | 14.02        | 472,324,578     | 15.14        |

**Supplemental Table 24.** Analysis of sodium bisulphite conversion based on chloroplast genomic DNA. Numbers in indicate the % of unmethylated cytosines.

| Genotype                  | CG    | CHG   | CHH   |
|---------------------------|-------|-------|-------|
| <i>420-CEN3</i> , naïve   | 99.69 | 99.65 | 99.63 |
| <i>met1/+</i>             | 99.70 | 99.68 | 99.65 |
| <i>420-CEN3 met1/+ 1</i>  | 99.71 | 99.67 | 99.65 |
| <i>420-CEN3 met1/+ 2</i>  | 99.65 | 99.62 | 99.60 |
| <i>420-CEN3 met1/+ 3</i>  | 99.69 | 99.66 | 99.64 |
| <i>420-CEN3 met1/+ 4</i>  | 99.69 | 99.66 | 99.64 |
| <i>420-CEN3 met1/+ 5</i>  | 99.65 | 99.61 | 99.60 |
| <i>420-CEN3 met1/+ 6</i>  | 99.70 | 99.67 | 99.65 |
| <i>420-CEN3 met1/+ 7</i>  | 99.70 | 99.67 | 99.64 |
| <i>420-CEN3 met1/+ 8</i>  | 99.70 | 99.67 | 99.65 |
| <i>420-CEN3 met1/+ 9</i>  | 99.65 | 99.64 | 99.61 |
| <i>420-CEN3 met1/+ 10</i> | 99.70 | 99.66 | 99.64 |
| <i>420-CEN3 met1/+ 11</i> | 99.70 | 99.67 | 99.65 |
| <i>420-CEN3 met1/+ 12</i> | 99.71 | 99.69 | 99.66 |
| <i>420-CEN3 met1/+ 13</i> | 99.71 | 99.68 | 99.66 |
| <i>420-CEN3 met1/+ 14</i> | 99.72 | 99.68 | 99.66 |

**Supplemental Table 25.** Methylation levels in *420-CEN3* naïve Col-0 and *met1/+* individuals. CG, CHG and CHH levels were calculated within *CEN3* or *420*. CG levels within genes, TEs or random sequences are also shown. Random sequences are 5 Mb total of randomly selected 1 kb probes throughout the genome.

| Genotype                  | <i>CEN3</i><br>CG | <i>CEN3</i><br>CHG | <i>CEN3</i><br>CHH | <i>420</i><br>CG | <i>420</i><br>CHG | <i>420</i><br>CHH | Gene<br>CG | TEs<br>CG | Random<br>CG |
|---------------------------|-------------------|--------------------|--------------------|------------------|-------------------|-------------------|------------|-----------|--------------|
| <i>420-CEN3</i> , naïve   | 70.32             | 31.68              | 7.93               | 12.19            | 1.47              | 0.91              | 12.89      | 53.77     | 28.27        |
| <i>420-CEN3 met1/+</i> 1  | 46.05             | 31.6               | 8.58               | 6.53             | 1.59              | 0.88              | 7.11       | 38.24     | 18.36        |
| <i>420-CEN3 met1/+</i> 2  | 53.55             | 32                 | 7.76               | 8.58             | 1.6               | 0.89              | 8.17       | 43.23     | 20.87        |
| <i>420-CEN3 met1/+</i> 3  | 48.50             | 30.18              | 7.91               | 7.01             | 1.4               | 0.82              | 8.00       | 41.83     | 20.28        |
| <i>420-CEN3 met1/+</i> 4  | 48.97             | 31.17              | 7.93               | 6.96             | 1.34              | 0.79              | 7.40       | 38.97     | 18.71        |
| <i>420-CEN3 met1/+</i> 5  | 53.63             | 34.22              | 8.85               | 8.47             | 1.68              | 0.92              | 7.89       | 40.49     | 19.62        |
| <i>420-CEN3 met1/+</i> 6  | 50.30             | 30.72              | 8.21               | 6.81             | 1.39              | 0.85              | 7.74       | 43.97     | 20.61        |
| <i>420-CEN3 met1/+</i> 7  | 49.67             | 30.92              | 8.17               | 6.53             | 1.51              | 0.87              | 7.25       | 40.00     | 18.95        |
| <i>420-CEN3 met1/+</i> 8  | 57.11             | 31.29              | 7.58               | 7.94             | 1.48              | 0.85              | 7.68       | 44.11     | 20.44        |
| <i>420-CEN3 met1/+</i> 9  | 58.76             | 33.04              | 8.43               | 6.81             | 1.43              | 0.87              | 8.30       | 43.97     | 20.98        |
| <i>420-CEN3 met1/+</i> 10 | 46.70             | 30.08              | 7.89               | 6.66             | 1.55              | 0.86              | 8.15       | 41.24     | 20.74        |
| <i>420-CEN3 met1/+</i> 11 | 48.95             | 30.27              | 7.61               | 6.93             | 1.43              | 0.81              | 7.47       | 40.92     | 19.14        |
| <i>420-CEN3 met1/+</i> 12 | 51.05             | 30.72              | 7.39               | 7.28             | 1.52              | 0.84              | 7.27       | 40.15     | 19.17        |
| <i>420-CEN3 met1/+</i> 13 | 54.23             | 28.86              | 6.97               | 6.67             | 1.38              | 0.81              | 7.43       | 43.64     | 20.13        |
| <i>420-CEN3 met1/+</i> 14 | 48.23             | 29.55              | 7.85               | 6.91             | 1.39              | 0.8               | 7.56       | 40.54     | 19.34        |
| <i>met1/+</i>             | 41.68             | 27.19              | 6.05               | 6.69             | 1.36              | 0.71              | 4.20       | 38.13     | 16.35        |

**Supplemental Table 26.** Correlations between crossover frequency and DNA methylation levels between chromosomal regions. The left flank within *CEN3* was from 11,115,724-12,782,751 bp, the core centromere was from 12,782,751-14,750,881 bp and the right flank was from 14,750,881-16,520,560 bp. Random sequences are 5 Mb total of randomly selected 1 kb probes throughout the genome. The centromeric regions analysed for each chromosome were between the following coordinates: *CEN1* was from 12-17.5 Mb, *CEN2* was from 1-7.5 Mb, *CEN4* was from 2-5.5 Mb and *CEN5* from 9.5-16 Mb. The chromosome 1 north sub-telomere region analysed was from 256,516-5,361,637 bp and the south sub-telomere was from 25-30 Mb. We also include two additional columns for the significant correlations, where we exclude the wild type (Col/Col) sample and repeat analysis.

| Region 1 / Parameter        | Region 2 / Parameter         | Spearman's <i>r</i><br>wt included | <i>P</i> value<br>wt included | Spearman's <i>r</i><br>wt excluded | <i>P</i> value<br>wt excluded |
|-----------------------------|------------------------------|------------------------------------|-------------------------------|------------------------------------|-------------------------------|
| <i>CEN3</i> / cM            | <i>CEN3</i> / CG             | 0.768                              | 0.0013                        | 0.714                              | 0.0056                        |
| <i>CEN3</i> / cM            | <i>CEN3</i> / CHG            | 0.179                              | 0.524                         |                                    |                               |
| <i>CEN3</i> / cM            | <i>CEN3</i> / CHH            | -0.384                             | 0.158                         |                                    |                               |
| <i>CEN3</i> / cM            | <i>CEN3</i> / All contexts   | 0.349                              | 0.203                         |                                    |                               |
|                             |                              |                                    |                               |                                    |                               |
| <i>CEN3</i> / cM            | <i>CEN3</i> / CG left flank  | 0.729                              | 0.0029                        | 0.666                              | 0.0115                        |
| <i>CEN3</i> / cM            | <i>CEN3</i> / CG right flank | 0.745                              | 0.0014                        | 0.686                              | 0.0067                        |
| <i>CEN3</i> / cM            | <i>CEN3</i> / CG core        | 0.786                              | 0.0008                        | 0.736                              | 0.0038                        |
| <i>CEN3</i> / CG            | <i>CEN3</i> / CG left flank  | 0.975                              | $< 2.2e^{-16}$                | 0.969                              | $< 2.2e^{-16}$                |
| <i>CEN3</i> / CG            | <i>CEN3</i> / CG right flank | 0.974                              | $9.005e^{-10}$                | 0.968                              | $1.421e^{-08}$                |
| <i>CEN3</i> / CG            | <i>CEN3</i> / CG core        | 0.989                              | $< 2.2e^{-16}$                | 0.987                              | $< 2.2e^{-16}$                |
| <i>CEN3</i> / CG left flank | <i>CEN3</i> / CG right flank | 0.928                              | $6.383e^{-07}$                | 0.911                              | $5.951e^{-06}$                |
|                             |                              |                                    |                               |                                    |                               |
| <i>CEN3</i> / cM            | <i>CEN1</i> / CG             | 0.146                              | 0.602                         |                                    |                               |
| <i>CEN3</i> / cM            | <i>CEN2</i> / CG             | 0.314                              | 0.254                         |                                    |                               |
| <i>CEN3</i> / cM            | <i>CEN4</i> / CG             | 0.190                              | 0.498                         |                                    |                               |
| <i>CEN3</i> / cM            | <i>CEN5</i> / CG             | -0.086                             | 0.763                         |                                    |                               |
| <i>CEN3</i> / cM            | Random1 / CG                 | 0.307                              | 0.265                         |                                    |                               |
| <i>CEN3</i> / cM            | Random2 / CG                 | 0.207                              | 0.458                         |                                    |                               |
|                             |                              |                                    |                               |                                    |                               |
| 420 / cM                    | 420 / CG                     | -0.319                             | 0.247                         |                                    |                               |
| 420 / cM                    | 420 / CHG                    | 0.542                              | 0.037                         | 0.592                              | 0.0257                        |
| 420 / cM                    | 420 / CHH                    | 0.202                              | 0.471                         |                                    |                               |
| 420 / cM                    | 420 / all contexts           | -0.084                             | 0.767                         |                                    |                               |
|                             |                              |                                    |                               |                                    |                               |
| 420 / cM                    | North sub-telomere Chr1 / CG | -0.175                             | 0.532                         |                                    |                               |
| 420 / cM                    | South sub-telomere Chr1 / CG | -0.410                             | 0.129                         |                                    |                               |
|                             |                              |                                    |                               |                                    |                               |
| 420 / cM                    | <i>CEN3</i> / cM             | -0.708                             | 0.0031                        | -0.640                             | 0.0136                        |
| 420 / cM                    | <i>CEN3</i> / CG             | -0.683                             | 0.0050                        | -0.609                             | 0.0207                        |
| <i>CEN3</i> / cM            | 420 / CG                     | 0.515                              | 0.049                         | 0.403                              | 0.153                         |
| 420 / CG                    | <i>CEN3</i> / CG             | 0.519                              | 0.048                         | 0.407                              | 0.148                         |

**Supplemental Table 27.**  $\gamma$ -H2AX foci count in wild type and *met1* leptotene stage meiocytes.

| Total number of $\gamma$ -H2AX foci |               | Total number of $\gamma$ -H2AX foci<br>on DAPI-dense regions |               |
|-------------------------------------|---------------|--------------------------------------------------------------|---------------|
| Wild-type                           | <i>met1-3</i> | Wild-type                                                    | <i>met1-3</i> |
| 156                                 | 133           | 2                                                            | 3             |
| 155                                 | 193           | 3                                                            | 5             |
| 150                                 | 233           | 6                                                            | 12            |
| 227                                 | 177           | 5                                                            | 3             |
| 148                                 | 128           | 5                                                            | 7             |
| 181                                 | 154           | 4                                                            | 4             |
| 209                                 | 227           | 4                                                            | 1             |
| 134                                 | 167           | 6                                                            | 7             |
| 151                                 |               | 10                                                           |               |
| 158                                 |               | 7                                                            |               |
| 155                                 |               | 2                                                            |               |
| 206                                 |               | 18                                                           |               |
| 153                                 |               | 6                                                            |               |
| 145                                 |               | 4                                                            |               |
| 186                                 |               | 2                                                            |               |
| 211                                 |               | 4                                                            |               |
| 154                                 |               | 14                                                           |               |
| 196                                 |               | 4                                                            |               |
| 197                                 |               | 3                                                            |               |
| 152                                 |               | 10                                                           |               |
| 194                                 |               | 3                                                            |               |

**Supplemental Table 28.** Fertility of *met1 spo11* mutant backgrounds.

| Genotype                 | No of seeds | No of siliques | Seeds per silique |
|--------------------------|-------------|----------------|-------------------|
| <i>spo11-1</i>           | 25          | 50             | 0.5               |
| <i>met1-3+/+ spo11-1</i> | 12          | 50             | 0.2               |
| <i>met1-3+/+ spo11-1</i> | 24          | 50             | 0.5               |
| <i>met1-3+/- spo11-1</i> | 0           | 50             | 0.0               |
| <i>met1-3+/- spo11-1</i> | 25          | 50             | 0.5               |
| <i>met1-3+/- spo11-1</i> | 0           | 50             | 0.0               |
| <i>met1-3-/- spo11-1</i> | 4           | 55             | 0.1               |
| <i>met1-3-/- spo11-1</i> | 1           | 50             | 0.0               |
| <i>met1-3-/- spo11-1</i> | 5           | 50             | 0.1               |
| <i>met1-3-/-</i>         | 360         | 12             | 30.0              |
| <i>met1-3-/-</i>         | 285         | 10             | 28.5              |
| <i>met1-3-/-</i>         | 211         | 10             | 21.1              |
| <i>met1-3-/-</i>         | 207         | 12             | 17.3              |
| <i>met1-3-/-</i>         | 253         | 10             | 25.3              |
| <i>met1-3-/-</i>         | 147         | 9              | 16.3              |
| <i>met1-3-/-</i>         | 214         | 10             | 21.4              |
| Col wild type            | 512         | 13             | 39.4              |

**Supplemental Table 29.** Oligonucleotides.

| Name                   | Sequence (5'-3')                                    | Application                           |
|------------------------|-----------------------------------------------------|---------------------------------------|
| bis7-3a-F2             | tggttttaaatygtggaagtaaataagaatagattttt              | 3a, BS-seq<br><i>HP3</i> _right       |
| bis7-3a-R2             | aacaaacttatccatattacaacaactaaaaactaaaaaaaa          | 3a, BS-seq<br><i>HP3</i> _right       |
| bis-3a-hp7-F9          | ttttttatataatttttttagaatttttagttaaygatttagtt        | 3a, BS-seq<br><i>HP3</i> _middle      |
| bis7-3a-R4             | acataaaaataaaattataacaactaccataactcrataaataa        | 3a, BS-seq<br><i>HP3</i> _middle      |
| bis7-3a-F6             | tataatagttaagagtaaaagatataaaaaaagtgtagagataaatygtt  | 3a, BS-seq<br><i>HP4</i> _left        |
| bis7-3a-R6             | tctcaataattttttttattttatttataataatactttttaataa      | 3a, BS-seq<br><i>HP4</i> _left        |
| bis-3a-hp7-F7          | gaagttagatttagttgaggagggtttttatttttggtttt           | 3a, BS-seq<br><i>HP3</i> _left        |
| bis-3a-hp7-R7          | aactcrrtaacattatttttaactaaatcrrtaactaaa             | 3a, BS-seq<br><i>HP3</i> _left        |
| bis-2885-F1            | aataatggaagtatatatttgagttgtattttataattgaagtttt      | 3a, BS-seq<br><i>HP4</i> _middle      |
| bis-2885-R1            | aacaaattcaatttattaaaaatctaataataaaattttatatattacaaa | 3a, BS-seq<br><i>HP4</i> _middle      |
| bis-2885-F2            | attttaatatagattttaataaattgaattgttttgagtgggtttatt    | 3a, BS-seq<br><i>HP4</i> _right       |
| bis-2885-R2            | ccaaaacaaaattttaatctttaattctctataactraaaa           | 3a, BS-seq<br><i>HP4</i> _right       |
| 3b-bis-F1              | tttaggggttttttgatttttagatattgaaagaaaaagat           | 3a, BS-seq<br><i>HP5</i> _left        |
| 3b-bis-R1              | aaaataaaacaataatatcttcccraatttcraatcaataa           | 3b, BS-seq<br><i>HP5</i> _left        |
| 3b-bis-F3              | attaatttatgggttatatatatttagagtagatattaaagtgaat      | 3b, BS-seq<br><i>HP5</i> _middle      |
| 3b-bis-R3              | aaaaacaaaacataacatataaaaaacttttaaacacattcaataa      | 3b, BS-seq<br><i>HP5</i> _middle      |
| 3b-bis-F6              | ygtttaatttttttgtttaattatgggataygaaataatgaygtt       | 3b, BS-seq<br><i>HP5</i> _right       |
| 3b-bis-R5              | aataaccratccaaatttattaaaaaaaaaaaaaaaaaactcrataaaa   | 3b, BS-seq<br><i>HP5</i> _right       |
| At3g02880-upstream-F   | caccttaccttccttcaaattgatac                          | 3a <i>HP1</i> cloning                 |
| At3g02880-upstream-R   | ctgttacgaacagcgagtaa                                | 3a <i>HP1</i> cloning & siRNA probe   |
| At3g02880-HindIII-F    | aagcttgagagaagaaagacagagctg                         | 3a <i>HP1</i> hairpin cloning         |
| At3g02880-HindIII-R    | ctttcttctcaagcttgccggctaagagagagaa                  | 3a <i>HP1</i> cloning                 |
| 3a-intergenic1-F       | caccgttctgttctagttgttcg                             | 3a <i>HP3</i> cloning and siRNA probe |
| 3a-intergenic1-R       | ggcgatttgtctctacactt                                | 3a <i>HP3</i> cloning and siRNA probe |
| 3a-intergenic1-EcoRI-F | gaattcctagtcacgaattcagccaaaaaac                     | 3a <i>HP3</i> cloning                 |
| 3a-intergenic2-EcoRI-R | gaattcgttgactaggaattctgggataagatgtg                 | 3a <i>HP3</i> cloning                 |

|                          |                                            |                                |
|--------------------------|--------------------------------------------|--------------------------------|
| At3g02885-gbm-F          | <u>cac</u> cttggacggccttcttag              | 3a HP4 cloning and siRNA probe |
| At3g02885-gbm-R          | atggcgaattgtatcagaag                       | 3a HP4 cloning and siRNA probe |
| At3g02885-gbm-HindIII-F  | <u>aag</u> cttcaatatcagaaaactaatagcc       | 3a HP4 cloning                 |
| At3g02885-gbm-HindIII-R  | gtttctgatattga <u>ag</u> ctttatatatatgacag | 3a HP4 cloning                 |
| At3g02880-gbm- F         | <u>cac</u> ctattcggttctttaccaatcg          | 3a HP2 cloning                 |
| At3g02880-gbm- R         | acggtgtttgtgtctcg                          | 3a HP2 cloning                 |
| At3g02880-EcoRV-F        | <u>gat</u> atcgatttgatggattgtg             | 3a HP2 cloning & siRNA probe   |
| At3g02880-EcoRV-R        | ccatccaaatc <u>gat</u> atcccgaaagatttcac   | 3a HP2 cloning                 |
| At3g02880-gbm-mid-R      | aatgtttccatgagaagtgtc                      | 3a HP2 cloning & siRNA probe   |
| Upstr-At3g02880-MCRBC-F1 | ccacttctaagttctctgttgacc                   | 3a, McrBC analysis             |
| upstr-At3g02880-MCRBC-R1 | aacgacctctgttttccttc                       | 3a, McrBC analysis             |
| upstr-At3g02880-MCRBC-F2 | gagagagaagaaagacagagctg                    | 3a, McrBC analysis             |
| upstr-At3g02880-MCRBC-R2 | cactcatgttccatagcaaagg                     | 3a, McrBC analysis             |
| Intergenic 1-MCRBC-F1    | ctccacatacaaacatcatc                       | 3a, McrBC analysis             |
| Intergenic 1-MCRBC-R1    | ctctgttttaatctgtttctacaag                  | 3a, McrBC analysis             |
| Intergenic 1-MCRBC-F2    | actcccgcccttttctac                         | 3a, McrBC analysis             |
| Intergenic 1-MCRBC-R2    | tggctgaatcgttgactagg                       | 3a, McrBC analysis             |
| gbm-At3g02885-MCRBC-F1   | cattgagatctttatgttcatgc                    | 3a, McrBC analysis             |
| gbm-At3g02885-MCRBC-R1   | ggcaatcaagatttttaacc                       | 3a, McrBC analysis             |
| gbm-At3g02885-MCRBC-F2   | ctttagaaacagattaaaacagag                   | 3a, McrBC analysis             |
| gbm-At3g02885-MCRBC-R2   | gcatgaacataaagatctcaatg                    | 3a, McrBC analysis             |
| gbm-At3g02880-MCRBC-F1   | ccgttgaactgggaaacc                         | 3a, McrBC analysis             |
| gbm-At3g02880-MCRBC-R1   | ctcaggttggtaccttgtag                       | 3a, McrBC analysis             |
| gbm-At3g02880-MCRBC-F2   | tcacggctctccgattac                         | 3a, McrBC analysis             |

|                        |                                                                           |                                             |
|------------------------|---------------------------------------------------------------------------|---------------------------------------------|
| gbm-At3g02880-MCRBC-R2 | ctgtcgctatctttcttctcc                                                     | 3a, <i>McrBC</i> analysis                   |
| 3b-dir-Fupstream       | caccttgataatgtcaataagataaatgc                                             | 3b <i>HP5</i> cloning                       |
| 3b-R                   | tcttagagttccgtacgtg                                                       | 3b <i>HP5</i> cloning                       |
| 3b-EcoRI-F             | gaattccaaccatctgtgtgtgg                                                   | 3b <i>HP5</i> cloning & siRNA probe         |
| 3b-EcoRI-R             | aacacagatgggtggaattcttattgtgtttcactttgatgct                               | 3b <i>HP5</i> cloning & siRNA probe         |
| siRNA-1-3b-F           | gaacctttaaattacaactgg                                                     | 3b <i>HP5</i> siRNA probe,                  |
| siRNA-2-3b-R           | tgaagcacattcaatggtgg                                                      | 3b <i>HP5</i> siRNA probe                   |
| 3b-long-5MCRBC-F       | ctaagagaacacgatacgaaatc                                                   | 3b, <i>McrBC</i>                            |
| 3b-long-5MCRBC-R       | gctgttatatcgtcgaatgg                                                      | 3b, <i>McrBC</i>                            |
| 3b-3MCRBC-F            | gcagagcagaggaaatcaag                                                      | 3b, <i>McrBC</i>                            |
| 3b-3MCRBC-R            | ttgcatcaggacatgattg                                                       | 3b, <i>McrBC</i>                            |
| At5g13440-F            | acaagccaattttgctgagc                                                      | <i>McrBC</i> analysis, unmethylated control |
| At5g13440-R            | acaacagtccgagtgtcatggt                                                    | <i>McrBC</i> analysis, unmethylated control |
| LTR-Ta3-F              | tttgctctcaaactctcaattgaagttt                                              | <i>McrBC</i> analysis, methylated control   |
| LTR-Ta3-R              | tagggttcttagttgatctgtattgagctc                                            | <i>McrBC</i> analysis, methylated control   |
| met1-3-F               | gattgtgtctctactacagaggc                                                   | Genotyping <i>met1-3</i>                    |
| met1-3-R               | gttaagctcattcatagccttgc                                                   | Genotyping <i>met1-3</i>                    |
| met1-3-T               | tggacgtgaatgtagacacgtcg                                                   | Genotyping <i>met1-3</i>                    |
| fancm-F                | acaatatatgttcgtgcaggtgaagacattggaag                                       | Genotyping <i>fancm-1</i>                   |
| fancm-R                | caccaatagatgttgcgacaat                                                    | Genotyping <i>fancm-1</i>                   |
| zip4-F                 | gctggatcgagctcttgaat                                                      | Genotyping <i>zip4-2</i>                    |
| zip4-R                 | attctgttctcgcttccag                                                       | Genotyping <i>zip4-2</i>                    |
| SALK-LB                | caaaccagcgtggaccgcttgctg                                                  | Genotyping <i>zip4-2</i>                    |
| PE-top adapter         | acactctttccctacacgacgctcttccgatct                                         | BS-seq NGS library construction             |
| PE-bottom adapter      | gatcggaagagcgggtcagcaggaatgccgag                                          | BS-seq NGS library construction             |
| PE1.0                  | aatgatacggcgaccaccgagatctacactctttccctacacgacgctcttcgatct                 | BS-seq NGS library construction             |
| iCPRtag1               | caagcagaagacggcatacagataacgtgatgagatcgggtctcggcattcctgctgaaccgctcttccgatc | BS-seq NGS library construction             |

|            |                                                                                  |                                    |
|------------|----------------------------------------------------------------------------------|------------------------------------|
| iCPRtag2   | caagcagaagacggcatacagagataaacatcggagatcgggtctcggcatt<br>cctgctgaaccgctcttccgatac | BS-seq NGS library<br>construction |
| iCPRtag3   | caagcagaagacggcatacagagatatgcctaagagatcgggtctcggcatt<br>cctgctgaaccgctcttccgatac | BS-seq NGS library<br>construction |
| iCPRtag4   | caagcagaagacggcatacagagatagtggtcagagatcgggtctcggcatt<br>cctgctgaaccgctcttccgatac | BS-seq NGS library<br>construction |
| iCPRtag5   | caagcagaagacggcatacagataaccactgtgagatcgggtctcggcatt<br>cctgctgaaccgctcttccgatac  | BS-seq NGS library<br>construction |
| iCPRtag6   | caagcagaagacggcatacagatacattggcgagatcgggtctcggcatt<br>cctgctgaaccgctcttccgatac   | BS-seq NGS library<br>construction |
| iCPRtag7   | caagcagaagacggcatacagatcagatctggagatcgggtctcggcatt<br>cctgctgaaccgctcttccgatac   | BS-seq NGS library<br>construction |
| iCPRtag8   | caagcagaagacggcatacagatcatcaagtgagatcgggtctcggcatt<br>cctgctgaaccgctcttccgatac   | BS-seq NGS library<br>construction |
| iCPRtag9   | caagcagaagacggcatacagatcgctgatcgagatcgggtctcggcatt<br>cctgctgaaccgctcttccgatac   | BS-seq NGS library<br>construction |
| iCPRtag10  | caagcagaagacggcatacagatacaagctagagatcgggtctcggcatt<br>cctgctgaaccgctcttccgatac   | BS-seq NGS library<br>construction |
| iCPRtag11  | caagcagaagacggcatacagatctgtagccgagatcgggtctcggcatt<br>cctgctgaaccgctcttccgatac   | BS-seq NGS library<br>construction |
| iCPRtag12  | caagcagaagacggcatacagatagtagcaaggagatcgggtctcggcatt<br>cctgctgaaccgctcttccgatac  | BS-seq NGS library<br>construction |
| iCPRtag13  | caagcagaagacggcatacagataacaaccagagatcgggtctcggcat<br>tcctgctgaaccgctcttccgatac   | BS-seq NGS library<br>construction |
| iCPRtag14  | caagcagaagacggcatacagataaaccgagagagatcgggtctcggcat<br>tcctgctgaaccgctcttccgatac  | BS-seq NGS library<br>construction |
| iCPRtag15  | caagcagaagacggcatacagataacgcttagagatcgggtctcggcatt<br>cctgctgaaccgctcttccgatac   | BS-seq NGS library<br>construction |
| iCPRtag16  | caagcagaagacggcatacagataaagacggagagatcgggtctcggcat<br>tcctgctgaaccgctcttccgatac  | BS-seq NGS library<br>construction |
| iCPRtag17  | caagcagaagacggcatacagataaaggtagagatcgggtctcggcatt<br>cctgctgaaccgctcttccgatac    | BS-seq NGS library<br>construction |
| Ta2-JP1725 | aaacgatgcgttgggatatggtc                                                          | ChIP-qPCR                          |
| Ta2-JP1726 | atactctccacttcccgttttctttta                                                      | ChIP-qPCR                          |

|                  |                            |           |
|------------------|----------------------------|-----------|
| ACTIN 2/7-JP1595 | cgtttcgcttccttagtgtagct    | ChIP-qPCR |
| ACTIN 2/7-JP1596 | agcgaacggatctagagactcacctg | ChIP-qPCR |
| HP3-ChiP-F1      | tttacaccgagtcattgggca      | ChIP-qPCR |
| HP3-ChiP-R1      | accatcaacttgctaaggctca     | ChIP-qPCR |
| HP3-ChiP-F2      | tggtcgtaattcttgagcctca     | ChIP-qPCR |
| HP3-ChiP-R2      | tggctgaatcggtgactagga      | ChIP-qPCR |
| HP4-ChiP-F1      | ttgggggttgagttgccac        | ChIP-qPCR |
| HP4-ChiP-R1      | tgtcagtcctcaacctcggt       | ChIP-qPCR |
| HP4-ChiP-F2      | acggccttcttagtctcca        | ChIP-qPCR |
| HP4-ChiP-R2      | gtagctccgtgttcagca         | ChIP-qPCR |
| HP5-ChiP-F1      | aacacaaccgatgagcaagg       | ChIP-qPCR |
| HP5-ChiP-R1      | tcgtcgaatggggtagacat       | ChIP-qPCR |
| HP5-ChiP-F2      | actaggctgcgtcgtgtaaa       | ChIP-qPCR |
| HP5-ChiP-R2      | ggagttttgtccgtggctc        | ChIP-qPCR |

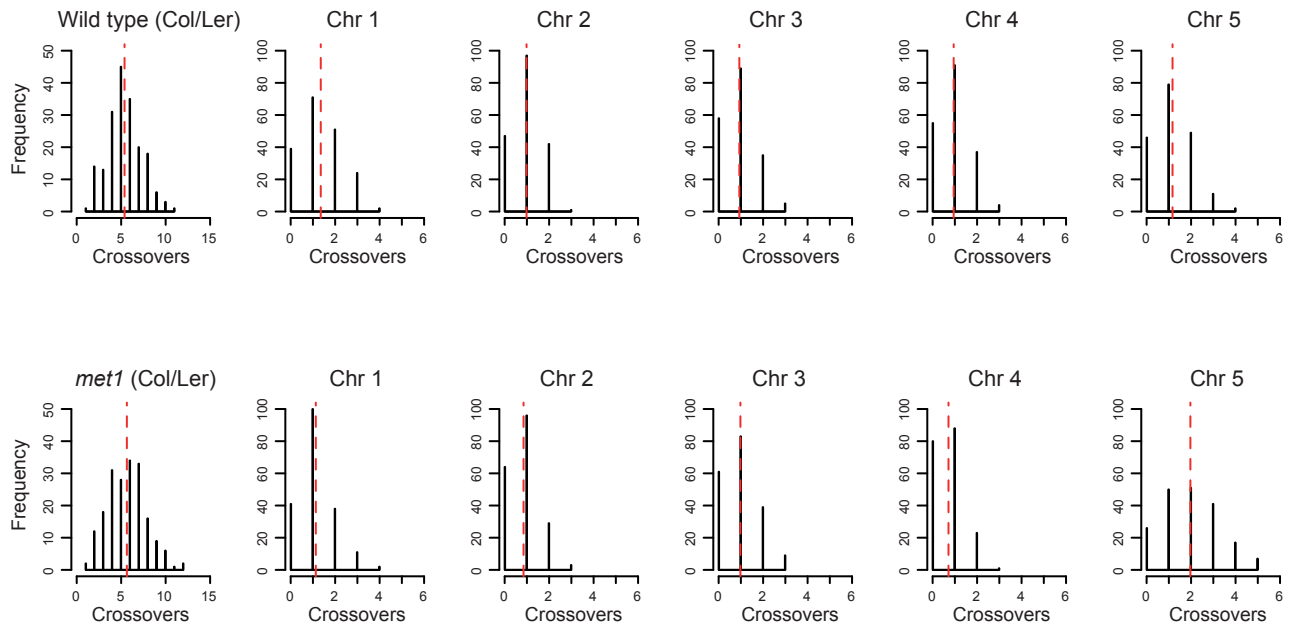

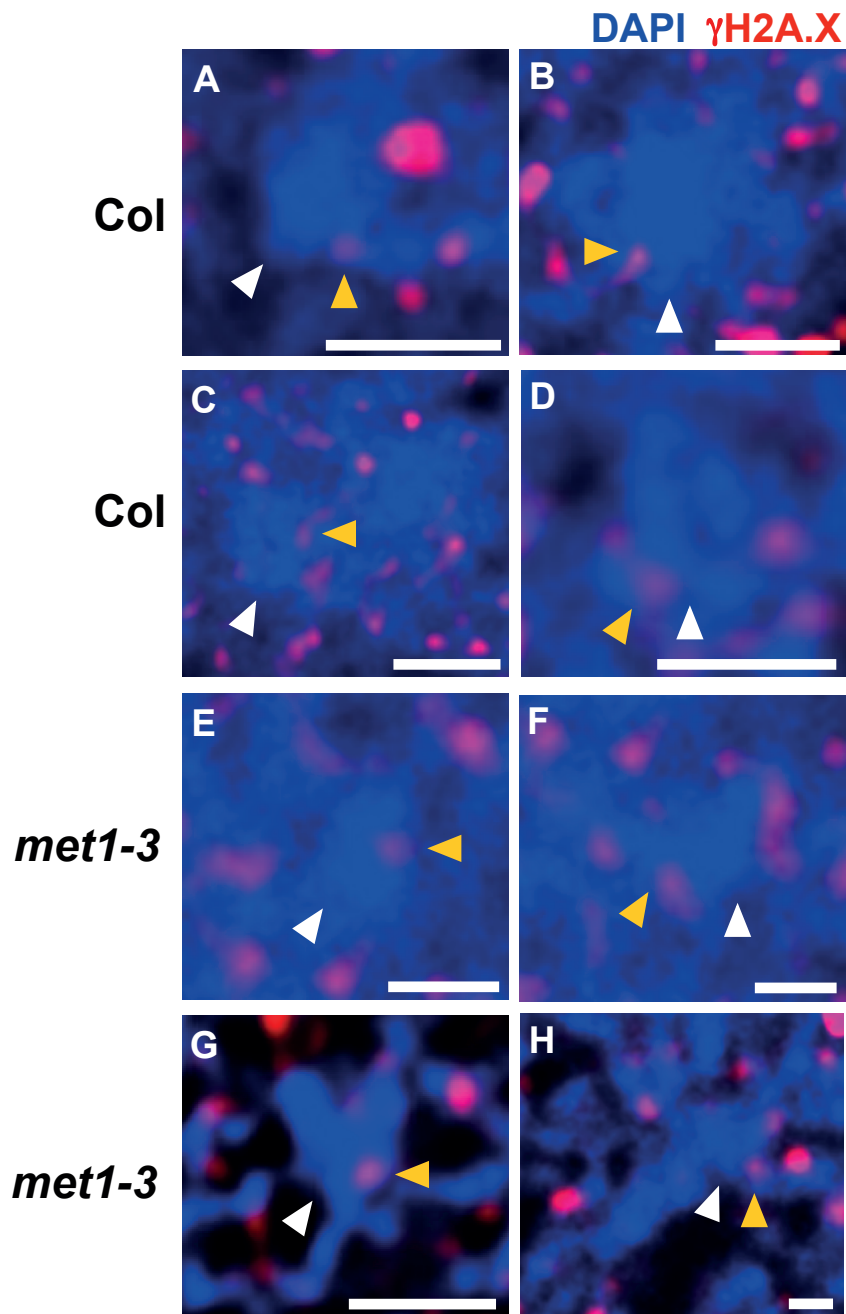

Supplement: supp_29.20.2183_SuppMaterial.pdf [file supp_29.20.2183_SuppMaterial.pdf]
